# Supplementary material
Source: publisher site journal article supplement (https://www.spandidos-publications.com/3129/downloadSupplementary)
Supplement: Supplementary file 1 [file downloadSupplementary]

## Sheet: DElncRNA-DEmRNA
Table SX. Co-expression analysis between DElncRNAs and DEmRNAs.
DElncRNA	DEmRNA	Gene_id	Gene_name	Correlation
NONRATT018005.2	ENSRNOT00000047043	ENSRNOG00000040101	RGD1563581	-0.998439
NONRATT021604.2	ENSRNOT00000081484	ENSRNOG00000011351	Mat1a	-0.997905
NONRATT020488.2	ENSRNOT00000014762	ENSRNOG00000010891	Lrrcc1	-0.997785
NONRATT016334.2	ENSRNOT00000041288	ENSRNOG00000012819	Gdnf	-0.997772
NONRATT023599.2	ENSRNOT00000005797	ENSRNOG00000004278	Dlx3	-0.997428
NONRATT018183.2	ENSRNOT00000055271	ENSRNOG00000036827	Ppp1r1a	-0.996042
NONRATT014914.2	ENSRNOT00000041288	ENSRNOG00000012819	Gdnf	-0.995835
NONRATT008192.2	ENSRNOT00000041288	ENSRNOG00000012819	Gdnf	-0.995834
NONRATT026101.2	ENSRNOT00000009211	ENSRNOG00000006860	Itk	-0.995703
NONRATT001847.2	ENSRNOT00000029915	ENSRNOG00000025930	Chst13	-0.995673
NONRATT021604.2	ENSRNOT00000079283	ENSRNOG00000031834	Nkain4	-0.994907
NONRATT022503.2	ENSRNOT00000010831	ENSRNOG00000008074	Cyp11a1	-0.994894
NONRATT021604.2	ENSRNOT00000071387	ENSRNOG00000049054	Ntsr2	-0.994562
NONRATT027379.2	ENSRNOT00000082156	ENSRNOG00000025608	Lrat	-0.994335
NONRATT001847.2	ENSRNOT00000032249	ENSRNOG00000026653	Hcar2	-0.994083
NONRATT021604.2	ENSRNOT00000046010	ENSRNOG00000033152	LOC100360679	-0.993533
NONRATT024472.2	ENSRNOT00000001797	ENSRNOG00000001329	Gjc3	-0.992983
NONRATT021604.2	ENSRNOT00000061720	ENSRNOG00000000060	Cplx1	-0.9929
NONRATT017345.2	ENSRNOT00000032664	ENSRNOG00000023508	Mfsd2b	-0.992634
NONRATT002824.2	ENSRNOT00000078855	ENSRNOG00000061297	Metazoa_SRP	-0.992575
NONRATT022503.2	ENSRNOT00000047139	ENSRNOG00000029726	Gstm1	-0.992127
NONRATT015663.2	ENSRNOT00000040516	ENSRNOG00000015359	Arhgap40	-0.991822
NONRATT017620.2	ENSRNOT00000041288	ENSRNOG00000012819	Gdnf	-0.991777
NONRATT030463.2	ENSRNOT00000031117	ENSRNOG00000022802	Tmem184b	-0.991663
NONRATT025575.2	ENSRNOT00000074172	ENSRNOG00000049425	Fam167b	-0.991596
NONRATT018612.2	ENSRNOT00000032664	ENSRNOG00000023508	Mfsd2b	-0.991228
NONRATT018005.2	ENSRNOT00000088665	ENSRNOG00000049642	Smim5	-0.991193
NONRATT021604.2	ENSRNOT00000082156	ENSRNOG00000025608	Lrat	-0.991138
NONRATT017442.2	ENSRNOT00000079773	ENSRNOG00000010451	Slc34a3	-0.990856
ENSRNOT00000088061	ENSRNOT00000003248	ENSRNOG00000002343	Uchl1	-0.990795
NONRATT001041.2	ENSRNOT00000004263	ENSRNOG00000003189	Cited1	-0.990695
NONRATT018005.2	ENSRNOT00000078507	ENSRNOG00000033215	RT1-Db1	-0.990636
NONRATT027338.2	ENSRNOT00000032664	ENSRNOG00000023508	Mfsd2b	-0.990603
ENSRNOT00000089910	ENSRNOT00000026893	ENSRNOG00000019857	Gng7	-0.990236
NONRATT016226.2	ENSRNOT00000088665	ENSRNOG00000049642	Smim5	-0.990137
NONRATT005775.2	ENSRNOT00000004263	ENSRNOG00000003189	Cited1	-0.990023
NONRATT006933.2	ENSRNOT00000082156	ENSRNOG00000025608	Lrat	0.99001
MSTRG.10244.2	ENSRNOT00000031734	ENSRNOG00000016737	Tcerg1l	0.990024
MSTRG.11449.2	ENSRNOT00000031734	ENSRNOG00000016737	Tcerg1l	0.990024
MSTRG.11597.1	ENSRNOT00000031734	ENSRNOG00000016737	Tcerg1l	0.990024
MSTRG.11664.1	ENSRNOT00000031734	ENSRNOG00000016737	Tcerg1l	0.990024
MSTRG.6537.3	ENSRNOT00000031734	ENSRNOG00000016737	Tcerg1l	0.990024
ENSRNOT00000090050	ENSRNOT00000031734	ENSRNOG00000016737	Tcerg1l	0.990024
NONRATT001948.2	ENSRNOT00000031734	ENSRNOG00000016737	Tcerg1l	0.990024
NONRATT002900.2	ENSRNOT00000031734	ENSRNOG00000016737	Tcerg1l	0.990024
NONRATT003529.2	ENSRNOT00000031734	ENSRNOG00000016737	Tcerg1l	0.990024
NONRATT003607.2	ENSRNOT00000031734	ENSRNOG00000016737	Tcerg1l	0.990024
NONRATT021201.2	ENSRNOT00000031734	ENSRNOG00000016737	Tcerg1l	0.990024
NONRATT021694.2	ENSRNOT00000031734	ENSRNOG00000016737	Tcerg1l	0.990024
NONRATT030878.2	ENSRNOT00000031734	ENSRNOG00000016737	Tcerg1l	0.990024
NONRATT030984.2	ENSRNOT00000031734	ENSRNOG00000016737	Tcerg1l	0.990024
NONRATT017117.2	ENSRNOT00000038546	ENSRNOG00000021323	Car13	0.990032
MSTRG.15013.1	ENSRNOT00000013322	ENSRNOG00000009712	Gale	0.990038
NONRATT024018.2	ENSRNOT00000042494	ENSRNOG00000028985	LOC361914	0.990042
NONRATT022927.2	ENSRNOT00000013322	ENSRNOG00000009712	Gale	0.990057
NONRATT017624.2	ENSRNOT00000010990	ENSRNOG00000025898	LOC690142	0.990061
NONRATT007028.2	ENSRNOT00000037185	ENSRNOG00000014847	Rassf10	0.990063
NONRATT015869.2	ENSRNOT00000013073	ENSRNOG00000009734	Akr1b8	0.990069
ENSRNOT00000082061	ENSRNOT00000013073	ENSRNOG00000009734	Akr1b8	0.990069
NONRATT023125.2	ENSRNOT00000004908	ENSRNOG00000003681	Lct	0.990071
NONRATT003204.2	ENSRNOT00000055200	ENSRNOG00000036802	Snhg11	0.990072
NONRATT016850.2	ENSRNOT00000078348	ENSRNOG00000059579	Gpt2	0.990082
NONRATT027425.2	ENSRNOT00000003691	ENSRNOG00000002643	Ugdh	0.990085
NONRATT020829.2	ENSRNOT00000027022	ENSRNOG00000019920	Doc2a	0.990095
NONRATT020616.2	ENSRNOT00000091317	ENSRNOG00000022802	Tmem184b	0.990097
NONRATT024018.2	ENSRNOT00000003567	ENSRNOG00000002525	Ptgs2	0.990098
MSTRG.88.2	ENSRNOT00000019442	ENSRNOG00000014366	Shc3	0.990102
MSTRG.8246.4	ENSRNOT00000027493	ENSRNOG00000020272	5330417C22Rik	0.990103
NONRATT016976.2	ENSRNOT00000058838	ENSRNOG00000038572	Ncapg	0.990104
NONRATT003540.2	ENSRNOT00000035252	ENSRNOG00000023601	Elavl4	0.990106
NONRATT013695.2	ENSRNOT00000039954	ENSRNOG00000010031	Vtn	0.990107
NONRATT022282.2	ENSRNOT00000001162	ENSRNOG00000000871	Cd40lg	0.990129
ENSRNOT00000080938	ENSRNOT00000028082	ENSRNOG00000020686	Dkkl1	0.99013
NONRATT028730.2	ENSRNOT00000063995	ENSRNOG00000002471	Polq	0.990132
NONRATT011876.2	ENSRNOT00000047685	ENSRNOG00000014751	Ret	0.990133
NONRATT030524.2	ENSRNOT00000091317	ENSRNOG00000022802	Tmem184b	0.990154
NONRATT012180.2	ENSRNOT00000016568	ENSRNOG00000011548	Ebf2	0.990169
NONRATT028816.2	ENSRNOT00000040516	ENSRNOG00000015359	Arhgap40	0.990172
NONRATT017137.2	ENSRNOT00000031734	ENSRNOG00000016737	Tcerg1l	0.990174
NONRATT015869.2	ENSRNOT00000084220	ENSRNOG00000053889	Celsr3	0.990181
NONRATT000035.2	ENSRNOT00000012310	ENSRNOG00000032626	Mmp3	0.990183
ENSRNOT00000082061	ENSRNOT00000084220	ENSRNOG00000053889	Celsr3	0.990192
NONRATT030693.2	ENSRNOT00000003567	ENSRNOG00000002525	Ptgs2	0.990199
NONRATT027180.2	ENSRNOT00000091731	ENSRNOG00000000521	Cdkn1a	0.990204
ENSRNOT00000077676	ENSRNOT00000011945	ENSRNOG00000008816	Gpnmb	0.990208
NONRATT022043.2	ENSRNOT00000082688	ENSRNOG00000024237	Scel	0.990209
ENSRNOT00000080938	ENSRNOT00000027022	ENSRNOG00000019920	Doc2a	0.990223
NONRATT004866.2	ENSRNOT00000037752	ENSRNOG00000028404	Ppp1r1b	0.990234
MSTRG.11575.7	ENSRNOT00000016568	ENSRNOG00000011548	Ebf2	0.990236
MSTRG.2442.2	ENSRNOT00000016568	ENSRNOG00000011548	Ebf2	0.990236
MSTRG.8858.2	ENSRNOT00000016568	ENSRNOG00000011548	Ebf2	0.990236
NONRATT001297.2	ENSRNOT00000016568	ENSRNOG00000011548	Ebf2	0.990236
NONRATT005127.2	ENSRNOT00000016568	ENSRNOG00000011548	Ebf2	0.990236
NONRATT005145.2	ENSRNOT00000016568	ENSRNOG00000011548	Ebf2	0.990236
NONRATT009496.2	ENSRNOT00000016568	ENSRNOG00000011548	Ebf2	0.990236
NONRATT015446.2	ENSRNOT00000016568	ENSRNOG00000011548	Ebf2	0.990236
NONRATT019196.2	ENSRNOT00000016568	ENSRNOG00000011548	Ebf2	0.990236
NONRATT019486.2	ENSRNOT00000016568	ENSRNOG00000011548	Ebf2	0.990236
NONRATT019897.2	ENSRNOT00000016568	ENSRNOG00000011548	Ebf2	0.990236
NONRATT020509.2	ENSRNOT00000016568	ENSRNOG00000011548	Ebf2	0.990236
NONRATT021402.2	ENSRNOT00000016568	ENSRNOG00000011548	Ebf2	0.990236
NONRATT021997.2	ENSRNOT00000016568	ENSRNOG00000011548	Ebf2	0.990236
NONRATT022191.2	ENSRNOT00000016568	ENSRNOG00000011548	Ebf2	0.990236
NONRATT028587.2	ENSRNOT00000016568	ENSRNOG00000011548	Ebf2	0.990236
NONRATT029618.2	ENSRNOT00000016568	ENSRNOG00000011548	Ebf2	0.990236
NONRATT031263.2	ENSRNOT00000016568	ENSRNOG00000011548	Ebf2	0.990236
NONRATT031281.2	ENSRNOT00000016568	ENSRNOG00000011548	Ebf2	0.990236
NONRATT029937.2	ENSRNOT00000004900	ENSRNOG00000003580	Ucp1	0.990267
NONRATT020829.2	ENSRNOT00000091175	ENSRNOG00000053037	AABR07024139.1	0.990267
NONRATT027876.2	ENSRNOT00000091175	ENSRNOG00000053037	AABR07024139.1	0.99027
MSTRG.15013.1	ENSRNOT00000027022	ENSRNOG00000019920	Doc2a	0.990274
NONRATT011314.2	ENSRNOT00000012667	ENSRNOG00000009503	Depdc1	0.990276
NONRATT001282.2	ENSRNOT00000003567	ENSRNOG00000002525	Ptgs2	0.990277
NONRATT029937.2	ENSRNOT00000081951	ENSRNOG00000008310	Mpo	0.990316
NONRATT029937.2	ENSRNOT00000065759	ENSRNOG00000015086	Plin1	0.990316
NONRATT029937.2	ENSRNOT00000091197	ENSRNOG00000001001	Retn	0.990316
NONRATT029937.2	ENSRNOT00000038311	ENSRNOG00000009610	Tchhl1	0.990316
NONRATT002185.2	ENSRNOT00000080493	ENSRNOG00000058207	Olr1332	0.990318
NONRATT027218.2	ENSRNOT00000037185	ENSRNOG00000014847	Rassf10	0.990325
NONRATT028730.2	ENSRNOT00000072983	ENSRNOG00000046343	AABR07067896.1	0.990335
NONRATT008391.2	ENSRNOT00000012667	ENSRNOG00000009503	Depdc1	0.990362
NONRATT017469.2	ENSRNOT00000033700	ENSRNOG00000023603	Amer3	0.990365
NONRATT022693.2	ENSRNOT00000003567	ENSRNOG00000002525	Ptgs2	0.990365
MSTRG.460.5	ENSRNOT00000031734	ENSRNOG00000016737	Tcerg1l	0.990368
NONRATT006699.2	ENSRNOT00000033123	ENSRNOG00000025198	Gas2l3	0.990371
NONRATT026123.2	ENSRNOT00000086653	ENSRNOG00000011654	Plk4	0.990371
NONRATT008688.2	ENSRNOT00000001162	ENSRNOG00000000871	Cd40lg	0.990404
NONRATT031141.2	ENSRNOT00000001211	ENSRNOG00000000903	Asl	0.990423
NONRATT030662.2	ENSRNOT00000016540	ENSRNOG00000012404	Thrsp	0.990427
NONRATT016307.2	ENSRNOT00000016568	ENSRNOG00000011548	Ebf2	0.990429
NONRATT019483.2	ENSRNOT00000076780	ENSRNOG00000011160	Sv2b	0.990457
NONRATT009960.2	ENSRNOT00000031734	ENSRNOG00000016737	Tcerg1l	0.990466
NONRATT002602.2	ENSRNOT00000051892	ENSRNOG00000020578	Ceacam1	0.990467
NONRATT003540.2	ENSRNOT00000089616	ENSRNOG00000020970	Rundc3a	0.990469
NONRATT027309.2	ENSRNOT00000034970	ENSRNOG00000027739	Cndp1	0.990482
NONRATT013518.2	ENSRNOT00000042494	ENSRNOG00000028985	LOC361914	0.990485
NONRATT001131.2	ENSRNOT00000004383	ENSRNOG00000003262	Cacng4	0.990496
NONRATT017226.2	ENSRNOT00000016540	ENSRNOG00000012404	Thrsp	0.990497
NONRATT015052.2	ENSRNOT00000082845	ENSRNOG00000055886	AABR07051399.1	0.990502
NONRATT015702.2	ENSRNOT00000066821	ENSRNOG00000021160	Hormad1	0.990511
NONRATT025255.2	ENSRNOT00000019080	ENSRNOG00000014008	Mfsd2a	0.990521
NONRATT000641.2	ENSRNOT00000066659	ENSRNOG00000024640	Oacyl	0.990532
NONRATT025221.2	ENSRNOT00000038228	ENSRNOG00000027787	Cdc6	0.990551
NONRATT002972.2	ENSRNOT00000068690	ENSRNOG00000032805	Cyp2f4	0.990561
NONRATT025575.2	ENSRNOT00000079283	ENSRNOG00000031834	Nkain4	0.990572
NONRATT003305.2	ENSRNOT00000033953	ENSRNOG00000023092	Prss54	0.990582
NONRATT008278.2	ENSRNOT00000012667	ENSRNOG00000009503	Depdc1	0.990582
NONRATT028730.2	ENSRNOT00000065349	ENSRNOG00000000479	Kifc1	0.990589
NONRATT010212.2	ENSRNOT00000072983	ENSRNOG00000046343	AABR07067896.1	0.990603
NONRATT003389.2	ENSRNOT00000016568	ENSRNOG00000011548	Ebf2	0.990611
NONRATT001520.2	ENSRNOT00000003567	ENSRNOG00000002525	Ptgs2	0.990615
NONRATT010673.2	ENSRNOT00000012667	ENSRNOG00000009503	Depdc1	0.990616
NONRATT027876.2	ENSRNOT00000001211	ENSRNOG00000000903	Asl	0.990623
NONRATT030412.2	ENSRNOT00000068148	ENSRNOG00000002385	Prg4	0.990627
NONRATT026525.2	ENSRNOT00000076780	ENSRNOG00000011160	Sv2b	0.990633
NONRATT030503.2	ENSRNOT00000002776	ENSRNOG00000002031	Naa11	0.990637
NONRATT030662.2	ENSRNOT00000019415	ENSRNOG00000014378	Il1r2	0.990639
MSTRG.6245.1	ENSRNOT00000014035	ENSRNOG00000010490	Hes2	0.990645
MSTRG.8246.4	ENSRNOT00000082688	ENSRNOG00000024237	Scel	0.990652
NONRATT020790.2	ENSRNOT00000088853	ENSRNOG00000052810	Cyp2c11	0.990658
NONRATT023587.2	ENSRNOT00000038816	ENSRNOG00000033970	Moap1	0.99066
NONRATT014819.2	ENSRNOT00000046010	ENSRNOG00000033152	LOC100360679	0.990664
NONRATT030524.2	ENSRNOT00000012196	ENSRNOG00000009172	Cpvl	0.990685
NONRATT003829.2	ENSRNOT00000027681	ENSRNOG00000020424	Ppapdc1a	0.990686
NONRATT017305.2	ENSRNOT00000027681	ENSRNOG00000020424	Ppapdc1a	0.990697
NONRATT008852.2	ENSRNOT00000083446	ENSRNOG00000057367	Glud1	0.990713
NONRATT017117.2	ENSRNOT00000013322	ENSRNOG00000009712	Gale	0.990753
NONRATT009960.2	ENSRNOT00000079371	ENSRNOG00000019100	Kif2c	0.990754
NONRATT010212.2	ENSRNOT00000027681	ENSRNOG00000020424	Ppapdc1a	0.990755
NONRATT027876.2	ENSRNOT00000027022	ENSRNOG00000019920	Doc2a	0.990761
ENSRNOT00000082061	ENSRNOT00000014035	ENSRNOG00000010490	Hes2	0.990764
NONRATT016768.2	ENSRNOT00000047139	ENSRNOG00000029726	Gstm1	0.990769
NONRATT012180.2	ENSRNOT00000085251	ENSRNOG00000017212	Spsb1	0.99077
NONRATT015869.2	ENSRNOT00000014035	ENSRNOG00000010490	Hes2	0.990773
NONRATT023983.2	ENSRNOT00000047139	ENSRNOG00000029726	Gstm1	0.990782
NONRATT027425.2	ENSRNOT00000025582	ENSRNOG00000018854	Nppc	0.990783
ENSRNOT00000090546	ENSRNOT00000047139	ENSRNOG00000029726	Gstm1	0.990783
NONRATT004936.2	ENSRNOT00000033953	ENSRNOG00000023092	Prss54	0.990861
NONRATT023125.2	ENSRNOT00000085251	ENSRNOG00000017212	Spsb1	0.990876
NONRATT023367.2	ENSRNOT00000090853	ENSRNOG00000057832	Rnf125	0.990881
NONRATT000035.2	ENSRNOT00000035252	ENSRNOG00000023601	Elavl4	0.990883
NONRATT001282.2	ENSRNOT00000080493	ENSRNOG00000058207	Olr1332	0.990894
MSTRG.11448.4	ENSRNOT00000005866	ENSRNOG00000004372	Cbln4	0.990901
NONRATT003888.2	ENSRNOT00000019442	ENSRNOG00000014366	Shc3	0.99093
MSTRG.8246.4	ENSRNOT00000001860	ENSRNOG00000001378	Iqcd	0.990932
NONRATT017624.2	ENSRNOT00000085251	ENSRNOG00000017212	Spsb1	0.990965
MSTRG.2420.1	ENSRNOT00000047139	ENSRNOG00000029726	Gstm1	0.99097
NONRATT008391.2	ENSRNOT00000003567	ENSRNOG00000002525	Ptgs2	0.990971
NONRATT026398.2	ENSRNOT00000003567	ENSRNOG00000002525	Ptgs2	0.99098
MSTRG.11448.4	ENSRNOT00000000018	ENSRNOG00000000017	Steap1	0.991009
MSTRG.6245.1	ENSRNOT00000013067	ENSRNOG00000009832	Slc39a14	0.991013
MSTRG.628.2	ENSRNOT00000070886	ENSRNOG00000047864	RT1-DMa	0.991016
NONRATT018222.2	ENSRNOT00000016568	ENSRNOG00000011548	Ebf2	0.99102
NONRATT009963.2	ENSRNOT00000080658	ENSRNOG00000055909	Apoa4	0.991021
NONRATT025255.2	ENSRNOT00000077275	ENSRNOG00000059579	Gpt2	0.991036
NONRATT016976.2	ENSRNOT00000012667	ENSRNOG00000009503	Depdc1	0.991063
NONRATT005621.2	ENSRNOT00000042494	ENSRNOG00000028985	LOC361914	0.991064
MSTRG.8246.4	ENSRNOT00000021901	ENSRNOG00000016295	Lyzl1	0.991071
NONRATT028882.2	ENSRNOT00000003735	ENSRNOG00000002793	Sstr2	0.991074
NONRATT018218.2	ENSRNOT00000088853	ENSRNOG00000052810	Cyp2c11	0.991075
NONRATT027180.2	ENSRNOT00000061176	ENSRNOG00000026037	Plb1	0.991089
NONRATT003540.2	ENSRNOT00000045156	ENSRNOG00000033803	Rpl37	0.991092
NONRATT021848.2	ENSRNOT00000016568	ENSRNOG00000011548	Ebf2	0.991096
NONRATT017620.2	ENSRNOT00000047043	ENSRNOG00000040101	RGD1563581	0.991109
NONRATT030693.2	ENSRNOT00000027681	ENSRNOG00000020424	Ppapdc1a	0.991117
NONRATT007471.2	ENSRNOT00000091317	ENSRNOG00000022802	Tmem184b	0.991131
MSTRG.14660.1	ENSRNOT00000000018	ENSRNOG00000000017	Steap1	0.991136
NONRATT008391.2	ENSRNOT00000065349	ENSRNOG00000000479	Kifc1	0.991138
NONRATT012080.2	ENSRNOT00000076780	ENSRNOG00000011160	Sv2b	0.99114
NONRATT016429.2	ENSRNOT00000005866	ENSRNOG00000004372	Cbln4	0.991149
ENSRNOT00000090546	ENSRNOT00000076904	ENSRNOG00000046790	Irs4	0.99116
MSTRG.11448.4	ENSRNOT00000089616	ENSRNOG00000020970	Rundc3a	0.991164
ENSRNOT00000091800	ENSRNOT00000001162	ENSRNOG00000000871	Cd40lg	0.991179
NONRATT003284.2	ENSRNOT00000088204	ENSRNOG00000056209	Exo1	0.991183
NONRATT028848.2	ENSRNOT00000029487	ENSRNOG00000020578	Ceacam1	0.991189
NONRATT020829.2	ENSRNOT00000001211	ENSRNOG00000000903	Asl	0.991191
NONRATT001131.2	ENSRNOT00000050279	ENSRNOG00000031521	Cldn24	0.991198
MSTRG.2420.1	ENSRNOT00000078348	ENSRNOG00000059579	Gpt2	0.991207
NONRATT012705.2	ENSRNOT00000001593	ENSRNOG00000001201	Cstb	0.991214
NONRATT018129.2	ENSRNOT00000088851	ENSRNOG00000055769	1810024B03Rik	0.991214
NONRATT022043.2	ENSRNOT00000079690	ENSRNOG00000053095	Rn60_20_0051.7	0.991222
NONRATT008422.2	ENSRNOT00000077275	ENSRNOG00000059579	Gpt2	0.991231
NONRATT017469.2	ENSRNOT00000006142	ENSRNOG00000004578	Cthrc1	0.991239
NONRATT000035.2	ENSRNOT00000028082	ENSRNOG00000020686	Dkkl1	0.991245
NONRATT010594.2	ENSRNOT00000008613	ENSRNOG00000006367	Slc5a8	0.991266
NONRATT000035.2	ENSRNOT00000011945	ENSRNOG00000008816	Gpnmb	0.99128
NONRATT019154.2	ENSRNOT00000055271	ENSRNOG00000036827	Ppp1r1a	0.991283
MSTRG.17916.1	ENSRNOT00000068690	ENSRNOG00000032805	Cyp2f4	0.991292
NONRATT009963.2	ENSRNOT00000090629	ENSRNOG00000020578	Ceacam1	0.991358
MSTRG.15332.1	ENSRNOT00000044638	ENSRNOG00000005307	Slc4a10	0.99138
NONRATT026921.2	ENSRNOT00000060962	ENSRNOG00000039740	Cenpk	0.991393
NONRATT025575.2	ENSRNOT00000071387	ENSRNOG00000049054	Ntsr2	0.991395
MSTRG.450.4	ENSRNOT00000031734	ENSRNOG00000016737	Tcerg1l	0.991407
NONRATT008192.2	ENSRNOT00000088665	ENSRNOG00000049642	Smim5	0.991418
NONRATT014914.2	ENSRNOT00000088665	ENSRNOG00000049642	Smim5	0.991426
NONRATT018222.2	ENSRNOT00000085251	ENSRNOG00000017212	Spsb1	0.991429
NONRATT017262.2	ENSRNOT00000041288	ENSRNOG00000012819	Gdnf	0.991447
NONRATT008852.2	ENSRNOT00000003691	ENSRNOG00000002643	Ugdh	0.991458
NONRATT010212.2	ENSRNOT00000063995	ENSRNOG00000002471	Polq	0.991465
NONRATT028049.2	ENSRNOT00000004908	ENSRNOG00000003681	Lct	0.991467
NONRATT000004.2	ENSRNOT00000010831	ENSRNOG00000008074	Cyp11a1	0.991471
NONRATT007463.2	ENSRNOT00000000523	ENSRNOG00000000451	RT1-Ba	0.991471
NONRATT003648.2	ENSRNOT00000022012	ENSRNOG00000016148	Gtse1	0.991482
NONRATT018944.2	ENSRNOT00000072100	ENSRNOG00000046239	LOC100909612	0.991493
NONRATT024018.2	ENSRNOT00000027681	ENSRNOG00000020424	Ppapdc1a	0.991515
NONRATT007148.2	ENSRNOT00000077177	ENSRNOG00000058780	Igfbp1	0.991532
ENSRNOT00000082061	ENSRNOT00000045156	ENSRNOG00000033803	Rpl37	0.991533
NONRATT028848.2	ENSRNOT00000018447	ENSRNOG00000013552	Scd1	0.991538
NONRATT015869.2	ENSRNOT00000045156	ENSRNOG00000033803	Rpl37	0.991543
MSTRG.5414.4	ENSRNOT00000072983	ENSRNOG00000046343	AABR07067896.1	0.991547
NONRATT010042.2	ENSRNOT00000006142	ENSRNOG00000004578	Cthrc1	0.99156
MSTRG.5414.4	ENSRNOT00000003567	ENSRNOG00000002525	Ptgs2	0.991572
MSTRG.17916.1	ENSRNOT00000013067	ENSRNOG00000009832	Slc39a14	0.991574
NONRATT026105.2	ENSRNOT00000089196	ENSRNOG00000015036	Ctgf	0.991595
NONRATT016429.2	ENSRNOT00000078348	ENSRNOG00000059579	Gpt2	0.991603
NONRATT000004.2	ENSRNOT00000091175	ENSRNOG00000053037	AABR07024139.1	0.991604
NONRATT018944.2	ENSRNOT00000004900	ENSRNOG00000003580	Ucp1	0.991608
NONRATT030412.2	ENSRNOT00000010831	ENSRNOG00000008074	Cyp11a1	0.99161
ENSRNOT00000077676	ENSRNOT00000003691	ENSRNOG00000002643	Ugdh	0.991616
NONRATT020790.2	ENSRNOT00000020505	ENSRNOG00000015076	Cyp26b1	0.991634
NONRATT018944.2	ENSRNOT00000081951	ENSRNOG00000008310	Mpo	0.991642
NONRATT018944.2	ENSRNOT00000065759	ENSRNOG00000015086	Plin1	0.991642
NONRATT018944.2	ENSRNOT00000091197	ENSRNOG00000001001	Retn	0.991642
NONRATT018944.2	ENSRNOT00000038311	ENSRNOG00000009610	Tchhl1	0.991642
NONRATT016225.2	ENSRNOT00000014762	ENSRNOG00000010891	Lrrcc1	0.991649
NONRATT028273.2	ENSRNOT00000019075	ENSRNOG00000014252	Irf2bp1	0.991664
NONRATT005639.2	ENSRNOT00000004900	ENSRNOG00000003580	Ucp1	0.991666
MSTRG.6245.1	ENSRNOT00000045156	ENSRNOG00000033803	Rpl37	0.991672
MSTRG.460.3	ENSRNOT00000003567	ENSRNOG00000002525	Ptgs2	0.991686
NONRATT025014.2	ENSRNOT00000085265	ENSRNOG00000052080	Camk2b	0.991694
NONRATT013083.2	ENSRNOT00000084220	ENSRNOG00000053889	Celsr3	0.991696
NONRATT001282.2	ENSRNOT00000039210	ENSRNOG00000042860	Pappa2	0.99171
NONRATT015869.2	ENSRNOT00000013119	ENSRNOG00000032832	Mmp10	0.991717
NONRATT015220.2	ENSRNOT00000077308	ENSRNOG00000061153	Hrh3	0.991719
ENSRNOT00000082061	ENSRNOT00000013119	ENSRNOG00000032832	Mmp10	0.991725
NONRATT005361.2	ENSRNOT00000018447	ENSRNOG00000013552	Scd1	0.991728
NONRATT001441.2	ENSRNOT00000086653	ENSRNOG00000011654	Plk4	0.991732
MSTRG.628.2	ENSRNOT00000044520	ENSRNOG00000059770	RT1-A3	0.991733
NONRATT016117.2	ENSRNOT00000086653	ENSRNOG00000011654	Plk4	0.991735
NONRATT003199.2	ENSRNOT00000089182	ENSRNOG00000033215	RT1-Db1	0.99175
NONRATT012705.2	ENSRNOT00000000018	ENSRNOG00000000017	Steap1	0.991756
NONRATT001282.2	ENSRNOT00000027681	ENSRNOG00000020424	Ppapdc1a	0.991757
NONRATT025255.2	ENSRNOT00000027022	ENSRNOG00000019920	Doc2a	0.991757
NONRATT029655.2	ENSRNOT00000016540	ENSRNOG00000012404	Thrsp	0.991763
NONRATT002685.2	ENSRNOT00000031693	ENSRNOG00000023126	Rxfp3	0.991767
NONRATT012613.2	ENSRNOT00000085880	ENSRNOG00000018929	Kif20b	0.991778
MSTRG.11575.7	ENSRNOT00000085251	ENSRNOG00000017212	Spsb1	0.991781
MSTRG.2442.2	ENSRNOT00000085251	ENSRNOG00000017212	Spsb1	0.991781
MSTRG.8858.2	ENSRNOT00000085251	ENSRNOG00000017212	Spsb1	0.991781
NONRATT001297.2	ENSRNOT00000085251	ENSRNOG00000017212	Spsb1	0.991781
NONRATT005127.2	ENSRNOT00000085251	ENSRNOG00000017212	Spsb1	0.991781
NONRATT005145.2	ENSRNOT00000085251	ENSRNOG00000017212	Spsb1	0.991781
NONRATT009496.2	ENSRNOT00000085251	ENSRNOG00000017212	Spsb1	0.991781
NONRATT015446.2	ENSRNOT00000085251	ENSRNOG00000017212	Spsb1	0.991781
NONRATT019196.2	ENSRNOT00000085251	ENSRNOG00000017212	Spsb1	0.991781
NONRATT019486.2	ENSRNOT00000085251	ENSRNOG00000017212	Spsb1	0.991781
NONRATT019897.2	ENSRNOT00000085251	ENSRNOG00000017212	Spsb1	0.991781
NONRATT020509.2	ENSRNOT00000085251	ENSRNOG00000017212	Spsb1	0.991781
NONRATT021402.2	ENSRNOT00000085251	ENSRNOG00000017212	Spsb1	0.991781
NONRATT021997.2	ENSRNOT00000085251	ENSRNOG00000017212	Spsb1	0.991781
NONRATT022191.2	ENSRNOT00000085251	ENSRNOG00000017212	Spsb1	0.991781
NONRATT028587.2	ENSRNOT00000085251	ENSRNOG00000017212	Spsb1	0.991781
NONRATT029618.2	ENSRNOT00000085251	ENSRNOG00000017212	Spsb1	0.991781
NONRATT031263.2	ENSRNOT00000085251	ENSRNOG00000017212	Spsb1	0.991781
NONRATT031281.2	ENSRNOT00000085251	ENSRNOG00000017212	Spsb1	0.991781
NONRATT009963.2	ENSRNOT00000040731	ENSRNOG00000030889	Cldn22	0.991786
NONRATT028730.2	ENSRNOT00000031734	ENSRNOG00000016737	Tcerg1l	0.991793
NONRATT012180.2	ENSRNOT00000004908	ENSRNOG00000003681	Lct	0.991806
NONRATT017226.2	ENSRNOT00000033953	ENSRNOG00000023092	Prss54	0.991829
NONRATT008807.2	ENSRNOT00000071931	ENSRNOG00000048140	Rn60_20_0048.4	0.991832
NONRATT008278.2	ENSRNOT00000072460	ENSRNOG00000049961	AABR07037923.2	0.991833
NONRATT011233.2	ENSRNOT00000071387	ENSRNOG00000049054	Ntsr2	0.991837
NONRATT021163.2	ENSRNOT00000011945	ENSRNOG00000008816	Gpnmb	0.991851
NONRATT005639.2	ENSRNOT00000072100	ENSRNOG00000046239	LOC100909612	0.991855
NONRATT011314.2	ENSRNOT00000027681	ENSRNOG00000020424	Ppapdc1a	0.991855
NONRATT026192.2	ENSRNOT00000037185	ENSRNOG00000014847	Rassf10	0.991863
NONRATT012705.2	ENSRNOT00000001860	ENSRNOG00000001378	Iqcd	0.991872
NONRATT008192.2	ENSRNOT00000078507	ENSRNOG00000033215	RT1-Db1	0.991894
MSTRG.2582.1	ENSRNOT00000080493	ENSRNOG00000058207	Olr1332	0.991905
NONRATT009960.2	ENSRNOT00000013005	ENSRNOG00000009660	Enpp6	0.991907
NONRATT014914.2	ENSRNOT00000078507	ENSRNOG00000033215	RT1-Db1	0.991912
NONRATT015996.2	ENSRNOT00000080658	ENSRNOG00000055909	Apoa4	0.991922
NONRATT014819.2	ENSRNOT00000027933	ENSRNOG00000020578	Ceacam1	0.991928
NONRATT026733.2	ENSRNOT00000070861	ENSRNOG00000046727	Abcc2	0.991951
NONRATT000035.2	ENSRNOT00000089616	ENSRNOG00000020970	Rundc3a	0.991955
NONRATT003389.2	ENSRNOT00000018447	ENSRNOG00000013552	Scd1	0.991955
NONRATT005639.2	ENSRNOT00000081951	ENSRNOG00000008310	Mpo	0.991959
NONRATT005639.2	ENSRNOT00000065759	ENSRNOG00000015086	Plin1	0.991959
NONRATT005639.2	ENSRNOT00000091197	ENSRNOG00000001001	Retn	0.991959
NONRATT005639.2	ENSRNOT00000038311	ENSRNOG00000009610	Tchhl1	0.991959
NONRATT014176.2	ENSRNOT00000001593	ENSRNOG00000001201	Cstb	0.991977
NONRATT005775.2	ENSRNOT00000047043	ENSRNOG00000040101	RGD1563581	0.99199
NONRATT002457.2	ENSRNOT00000066659	ENSRNOG00000024640	Oacyl	0.991994
NONRATT012710.2	ENSRNOT00000012667	ENSRNOG00000009503	Depdc1	0.992003
NONRATT006607.2	ENSRNOT00000087403	ENSRNOG00000058904	Tex13	0.992006
NONRATT001297.2	ENSRNOT00000004908	ENSRNOG00000003681	Lct	0.992007
NONRATT005127.2	ENSRNOT00000004908	ENSRNOG00000003681	Lct	0.992007
NONRATT005145.2	ENSRNOT00000004908	ENSRNOG00000003681	Lct	0.992007
NONRATT009496.2	ENSRNOT00000004908	ENSRNOG00000003681	Lct	0.992007
NONRATT015446.2	ENSRNOT00000004908	ENSRNOG00000003681	Lct	0.992007
NONRATT019196.2	ENSRNOT00000004908	ENSRNOG00000003681	Lct	0.992007
NONRATT019486.2	ENSRNOT00000004908	ENSRNOG00000003681	Lct	0.992007
NONRATT019897.2	ENSRNOT00000004908	ENSRNOG00000003681	Lct	0.992007
NONRATT020509.2	ENSRNOT00000004908	ENSRNOG00000003681	Lct	0.992007
NONRATT021402.2	ENSRNOT00000004908	ENSRNOG00000003681	Lct	0.992007
NONRATT021997.2	ENSRNOT00000004908	ENSRNOG00000003681	Lct	0.992007
NONRATT022191.2	ENSRNOT00000004908	ENSRNOG00000003681	Lct	0.992007
NONRATT028587.2	ENSRNOT00000004908	ENSRNOG00000003681	Lct	0.992007
NONRATT029618.2	ENSRNOT00000004908	ENSRNOG00000003681	Lct	0.992007
NONRATT031263.2	ENSRNOT00000004908	ENSRNOG00000003681	Lct	0.992007
NONRATT031281.2	ENSRNOT00000004908	ENSRNOG00000003681	Lct	0.992007
MSTRG.11575.7	ENSRNOT00000004908	ENSRNOG00000003681	Lct	0.992007
MSTRG.2442.2	ENSRNOT00000004908	ENSRNOG00000003681	Lct	0.992007
MSTRG.8858.2	ENSRNOT00000004908	ENSRNOG00000003681	Lct	0.992007
MSTRG.6245.1	ENSRNOT00000089616	ENSRNOG00000020970	Rundc3a	0.992025
NONRATT003540.2	ENSRNOT00000084220	ENSRNOG00000053889	Celsr3	0.992027
NONRATT025711.2	ENSRNOT00000047685	ENSRNOG00000014751	Ret	0.992034
NONRATT000035.2	ENSRNOT00000013067	ENSRNOG00000009832	Slc39a14	0.992043
NONRATT018129.2	ENSRNOT00000078348	ENSRNOG00000059579	Gpt2	0.992047
NONRATT013083.2	ENSRNOT00000005331	ENSRNOG00000003984	Apln	0.992047
NONRATT005842.2	ENSRNOT00000082688	ENSRNOG00000024237	Scel	0.992068
MSTRG.15332.1	ENSRNOT00000025770	ENSRNOG00000019050	Ifit1	0.992069
NONRATT023125.2	ENSRNOT00000018447	ENSRNOG00000013552	Scd1	0.992089
NONRATT011314.2	ENSRNOT00000080493	ENSRNOG00000058207	Olr1332	0.992093
NONRATT006603.2	ENSRNOT00000070886	ENSRNOG00000047864	RT1-DMa	0.992106
NONRATT000377.2	ENSRNOT00000002860	ENSRNOG00000002085	Thegl	0.992112
NONRATT001090.2	ENSRNOT00000055271	ENSRNOG00000036827	Ppp1r1a	0.992112
ENSRNOT00000082061	ENSRNOT00000089616	ENSRNOG00000020970	Rundc3a	0.992119
NONRATT015869.2	ENSRNOT00000089616	ENSRNOG00000020970	Rundc3a	0.992122
NONRATT030463.2	ENSRNOT00000046313	ENSRNOG00000014448	Arntl	0.992125
NONRATT013518.2	ENSRNOT00000027681	ENSRNOG00000020424	Ppapdc1a	0.992128
NONRATT005639.2	ENSRNOT00000016568	ENSRNOG00000011548	Ebf2	0.992138
NONRATT008278.2	ENSRNOT00000063995	ENSRNOG00000002471	Polq	0.992141
NONRATT002602.2	ENSRNOT00000070861	ENSRNOG00000046727	Abcc2	0.992152
NONRATT007430.2	ENSRNOT00000019080	ENSRNOG00000014008	Mfsd2a	0.992157
NONRATT005842.2	ENSRNOT00000068690	ENSRNOG00000032805	Cyp2f4	0.992158
NONRATT023983.2	ENSRNOT00000012310	ENSRNOG00000032626	Mmp3	0.992164
NONRATT029495.2	ENSRNOT00000038546	ENSRNOG00000021323	Car13	0.99217
NONRATT003284.2	ENSRNOT00000004969	ENSRNOG00000003703	Mcm6	0.992179
NONRATT014364.2	ENSRNOT00000012196	ENSRNOG00000009172	Cpvl	0.992189
NONRATT028848.2	ENSRNOT00000004908	ENSRNOG00000003681	Lct	0.992199
NONRATT023983.2	ENSRNOT00000068690	ENSRNOG00000032805	Cyp2f4	0.992208
MSTRG.13228.1	ENSRNOT00000016556	ENSRNOG00000012281	Adh6a	0.992223
NONRATT026105.2	ENSRNOT00000028487	ENSRNOG00000020970	Rundc3a	0.992232
NONRATT020911.2	ENSRNOT00000085251	ENSRNOG00000017212	Spsb1	0.992238
NONRATT022456.2	ENSRNOT00000068690	ENSRNOG00000032805	Cyp2f4	0.992267
MSTRG.2420.1	ENSRNOT00000040731	ENSRNOG00000030889	Cldn22	0.992282
MSTRG.11575.7	ENSRNOT00000029487	ENSRNOG00000020578	Ceacam1	0.992288
MSTRG.2442.2	ENSRNOT00000029487	ENSRNOG00000020578	Ceacam1	0.992288
MSTRG.8858.2	ENSRNOT00000029487	ENSRNOG00000020578	Ceacam1	0.992288
NONRATT001297.2	ENSRNOT00000029487	ENSRNOG00000020578	Ceacam1	0.992288
NONRATT005127.2	ENSRNOT00000029487	ENSRNOG00000020578	Ceacam1	0.992288
NONRATT005145.2	ENSRNOT00000029487	ENSRNOG00000020578	Ceacam1	0.992288
NONRATT009496.2	ENSRNOT00000029487	ENSRNOG00000020578	Ceacam1	0.992288
NONRATT015446.2	ENSRNOT00000029487	ENSRNOG00000020578	Ceacam1	0.992288
NONRATT019196.2	ENSRNOT00000029487	ENSRNOG00000020578	Ceacam1	0.992288
NONRATT019486.2	ENSRNOT00000029487	ENSRNOG00000020578	Ceacam1	0.992288
NONRATT019897.2	ENSRNOT00000029487	ENSRNOG00000020578	Ceacam1	0.992288
NONRATT020509.2	ENSRNOT00000029487	ENSRNOG00000020578	Ceacam1	0.992288
NONRATT021402.2	ENSRNOT00000029487	ENSRNOG00000020578	Ceacam1	0.992288
NONRATT021997.2	ENSRNOT00000029487	ENSRNOG00000020578	Ceacam1	0.992288
NONRATT022191.2	ENSRNOT00000029487	ENSRNOG00000020578	Ceacam1	0.992288
NONRATT028587.2	ENSRNOT00000029487	ENSRNOG00000020578	Ceacam1	0.992288
NONRATT029618.2	ENSRNOT00000029487	ENSRNOG00000020578	Ceacam1	0.992288
NONRATT031263.2	ENSRNOT00000029487	ENSRNOG00000020578	Ceacam1	0.992288
NONRATT031281.2	ENSRNOT00000029487	ENSRNOG00000020578	Ceacam1	0.992288
NONRATT014176.2	ENSRNOT00000057898	ENSRNOG00000038047	Mt1	0.992291
NONRATT029495.2	ENSRNOT00000009749	ENSRNOG00000007060	Plin2	0.992296
NONRATT023334.2	ENSRNOT00000080493	ENSRNOG00000058207	Olr1332	0.992329
NONRATT020195.2	ENSRNOT00000082688	ENSRNOG00000024237	Scel	0.99234
NONRATT020195.2	ENSRNOT00000079690	ENSRNOG00000053095	Rn60_20_0051.7	0.992369
MSTRG.2420.1	ENSRNOT00000013119	ENSRNOG00000032832	Mmp10	0.992374
MSTRG.6245.1	ENSRNOT00000011945	ENSRNOG00000008816	Gpnmb	0.992375
NONRATT018065.2	ENSRNOT00000016556	ENSRNOG00000012281	Adh6a	0.992378
NONRATT016429.2	ENSRNOT00000035252	ENSRNOG00000023601	Elavl4	0.992381
MSTRG.12799.3	ENSRNOT00000015716	ENSRNOG00000011427	Hr	0.992382
NONRATT001524.2	ENSRNOT00000031734	ENSRNOG00000016737	Tcerg1l	0.992419
NONRATT012613.2	ENSRNOT00000007806	ENSRNOG00000005858	Kap	0.992425
NONRATT003305.2	ENSRNOT00000038546	ENSRNOG00000021323	Car13	0.99243
NONRATT010212.2	ENSRNOT00000031734	ENSRNOG00000016737	Tcerg1l	0.992434
NONRATT009960.2	ENSRNOT00000003650	ENSRNOG00000002711	Nuf2	0.992444
NONRATT002861.2	ENSRNOT00000029487	ENSRNOG00000020578	Ceacam1	0.992452
NONRATT008312.2	ENSRNOT00000078919	ENSRNOG00000061414	Acot12	0.992454
NONRATT007552.2	ENSRNOT00000077275	ENSRNOG00000059579	Gpt2	0.992459
NONRATT023685.2	ENSRNOT00000009813	ENSRNOG00000007092	Fgb	0.992461
NONRATT028716.2	ENSRNOT00000004908	ENSRNOG00000003681	Lct	0.992462
NONRATT021163.2	ENSRNOT00000014035	ENSRNOG00000010490	Hes2	0.992481
NONRATT007552.2	ENSRNOT00000038546	ENSRNOG00000021323	Car13	0.992499
NONRATT010594.2	ENSRNOT00000019415	ENSRNOG00000014378	Il1r2	0.992509
NONRATT008278.2	ENSRNOT00000089332	ENSRNOG00000042860	Pappa2	0.992541
NONRATT012705.2	ENSRNOT00000061176	ENSRNOG00000026037	Plb1	0.992541
NONRATT002972.2	ENSRNOT00000013067	ENSRNOG00000009832	Slc39a14	0.99255
NONRATT000004.2	ENSRNOT00000011945	ENSRNOG00000008816	Gpnmb	0.992551
NONRATT010673.2	ENSRNOT00000031734	ENSRNOG00000016737	Tcerg1l	0.992565
NONRATT012705.2	ENSRNOT00000005866	ENSRNOG00000004372	Cbln4	0.992568
NONRATT018070.2	ENSRNOT00000032249	ENSRNOG00000026653	Hcar2	0.992574
NONRATT030503.2	ENSRNOT00000091317	ENSRNOG00000022802	Tmem184b	0.992579
NONRATT005621.2	ENSRNOT00000027681	ENSRNOG00000020424	Ppapdc1a	0.992587
NONRATT017960.2	ENSRNOT00000000523	ENSRNOG00000000451	RT1-Ba	0.99259
NONRATT008278.2	ENSRNOT00000031734	ENSRNOG00000016737	Tcerg1l	0.992601
NONRATT007463.2	ENSRNOT00000015716	ENSRNOG00000011427	Hr	0.992607
MSTRG.2582.1	ENSRNOT00000072983	ENSRNOG00000046343	AABR07067896.1	0.992612
NONRATT003284.2	ENSRNOT00000007806	ENSRNOG00000005858	Kap	0.992617
NONRATT025255.2	ENSRNOT00000013322	ENSRNOG00000009712	Gale	0.99264
NONRATT010212.2	ENSRNOT00000003567	ENSRNOG00000002525	Ptgs2	0.992661
NONRATT003305.2	ENSRNOT00000025582	ENSRNOG00000018854	Nppc	0.992667
NONRATT014183.2	ENSRNOT00000055200	ENSRNOG00000036802	Snhg11	0.992687
NONRATT025014.2	ENSRNOT00000082186	ENSRNOG00000060949	Anxa8	0.992701
NONRATT014530.2	ENSRNOT00000017174	ENSRNOG00000012772	Nqo1	0.992701
NONRATT009556.2	ENSRNOT00000033700	ENSRNOG00000023603	Amer3	0.992703
NONRATT027425.2	ENSRNOT00000013322	ENSRNOG00000009712	Gale	0.992704
NONRATT017137.2	ENSRNOT00000080493	ENSRNOG00000058207	Olr1332	0.992727
NONRATT000035.2	ENSRNOT00000076904	ENSRNOG00000046790	Irs4	0.992729
NONRATT011233.2	ENSRNOT00000081484	ENSRNOG00000011351	Mat1a	0.99273
NONRATT023983.2	ENSRNOT00000091175	ENSRNOG00000053037	AABR07024139.1	0.992753
MSTRG.11448.4	ENSRNOT00000084220	ENSRNOG00000053889	Celsr3	0.992768
NONRATT008391.2	ENSRNOT00000031734	ENSRNOG00000016737	Tcerg1l	0.992785
NONRATT022456.2	ENSRNOT00000013067	ENSRNOG00000009832	Slc39a14	0.992799
NONRATT007430.2	ENSRNOT00000003691	ENSRNOG00000002643	Ugdh	0.992805
NONRATT018825.2	ENSRNOT00000025770	ENSRNOG00000019050	Ifit1	0.992822
NONRATT020829.2	ENSRNOT00000019080	ENSRNOG00000014008	Mfsd2a	0.992828
MSTRG.2582.1	ENSRNOT00000072460	ENSRNOG00000049961	AABR07037923.2	0.992836
NONRATT004936.2	ENSRNOT00000052130	ENSRNOG00000030914	RGD1559493	0.99284
ENSRNOT00000077676	ENSRNOT00000013119	ENSRNOG00000032832	Mmp10	0.992843
NONRATT018129.2	ENSRNOT00000084220	ENSRNOG00000053889	Celsr3	0.992865
NONRATT013950.2	ENSRNOT00000024765	ENSRNOG00000018337	Caly	0.992879
NONRATT016429.2	ENSRNOT00000068690	ENSRNOG00000032805	Cyp2f4	0.992885
MSTRG.6245.1	ENSRNOT00000028082	ENSRNOG00000020686	Dkkl1	0.992887
NONRATT008278.2	ENSRNOT00000021320	ENSRNOG00000015921	Esco2	0.992891
NONRATT008278.2	ENSRNOT00000083849	ENSRNOG00000053795	SNORD45	0.992891
NONRATT023685.2	ENSRNOT00000057898	ENSRNOG00000038047	Mt1	0.992899
NONRATT010212.2	ENSRNOT00000065349	ENSRNOG00000000479	Kifc1	0.9929
NONRATT027425.2	ENSRNOT00000004383	ENSRNOG00000003262	Cacng4	0.992914
NONRATT008852.2	ENSRNOT00000091155	ENSRNOG00000007092	Fgb	0.99292
MSTRG.450.4	ENSRNOT00000080493	ENSRNOG00000058207	Olr1332	0.992925
NONRATT006933.2	ENSRNOT00000046010	ENSRNOG00000033152	LOC100360679	0.992927
NONRATT012705.2	ENSRNOT00000089616	ENSRNOG00000020970	Rundc3a	0.992958
MSTRG.15332.1	ENSRNOT00000082533	ENSRNOG00000053406	Gramd1c	0.992969
NONRATT007028.2	ENSRNOT00000018699	ENSRNOG00000003094	Cmah	0.992981
NONRATT010594.2	ENSRNOT00000052130	ENSRNOG00000030914	RGD1559493	0.992997
NONRATT012180.2	ENSRNOT00000029487	ENSRNOG00000020578	Ceacam1	0.993003
NONRATT021848.2	ENSRNOT00000085251	ENSRNOG00000017212	Spsb1	0.993006
NONRATT027876.2	ENSRNOT00000019080	ENSRNOG00000014008	Mfsd2a	0.993006
NONRATT001520.2	ENSRNOT00000027681	ENSRNOG00000020424	Ppapdc1a	0.993014
NONRATT016850.2	ENSRNOT00000033443	ENSRNOG00000028025	Aknad1	0.993018
NONRATT013328.2	ENSRNOT00000085251	ENSRNOG00000017212	Spsb1	0.993024
NONRATT003337.2	ENSRNOT00000004908	ENSRNOG00000003681	Lct	0.993028
NONRATT025255.2	ENSRNOT00000091175	ENSRNOG00000053037	AABR07024139.1	0.993029
ENSRNOT00000077676	ENSRNOT00000040731	ENSRNOG00000030889	Cldn22	0.993031
NONRATT026641.2	ENSRNOT00000005797	ENSRNOG00000004278	Dlx3	0.993047
NONRATT023367.2	ENSRNOT00000013067	ENSRNOG00000009832	Slc39a14	0.993053
NONRATT001131.2	ENSRNOT00000003691	ENSRNOG00000002643	Ugdh	0.993056
NONRATT022693.2	ENSRNOT00000080493	ENSRNOG00000058207	Olr1332	0.99308
NONRATT008312.2	ENSRNOT00000027022	ENSRNOG00000019920	Doc2a	0.993088
NONRATT008239.2	ENSRNOT00000044520	ENSRNOG00000059770	RT1-A3	0.993089
NONRATT002642.2	ENSRNOT00000085251	ENSRNOG00000017212	Spsb1	0.993092
MSTRG.17916.1	ENSRNOT00000090853	ENSRNOG00000057832	Rnf125	0.993117
NONRATT013328.2	ENSRNOT00000004908	ENSRNOG00000003681	Lct	0.993123
NONRATT008278.2	ENSRNOT00000013423	ENSRNOG00000009875	Akr1b7	0.993129
NONRATT005891.2	ENSRNOT00000072483	ENSRNOG00000001960	Sult1d1	0.993137
NONRATT023367.2	ENSRNOT00000001860	ENSRNOG00000001378	Iqcd	0.993139
MSTRG.14660.1	ENSRNOT00000027022	ENSRNOG00000019920	Doc2a	0.993154
NONRATT031141.2	ENSRNOT00000078348	ENSRNOG00000059579	Gpt2	0.993158
NONRATT016429.2	ENSRNOT00000005331	ENSRNOG00000003984	Apln	0.993166
NONRATT018070.2	ENSRNOT00000080658	ENSRNOG00000055909	Apoa4	0.993168
NONRATT027876.2	ENSRNOT00000077275	ENSRNOG00000059579	Gpt2	0.993172
MSTRG.6245.1	ENSRNOT00000076904	ENSRNOG00000046790	Irs4	0.993193
NONRATT020829.2	ENSRNOT00000077275	ENSRNOG00000059579	Gpt2	0.993196
NONRATT028730.2	ENSRNOT00000012667	ENSRNOG00000009503	Depdc1	0.993231
NONRATT022456.2	ENSRNOT00000082688	ENSRNOG00000024237	Scel	0.993239
NONRATT022693.2	ENSRNOT00000063995	ENSRNOG00000002471	Polq	0.993241
NONRATT018005.2	ENSRNOT00000041288	ENSRNOG00000012819	Gdnf	0.993242
NONRATT023367.2	ENSRNOT00000035252	ENSRNOG00000023601	Elavl4	0.993265
NONRATT030412.2	ENSRNOT00000047139	ENSRNOG00000029726	Gstm1	0.993286
NONRATT013950.2	ENSRNOT00000019442	ENSRNOG00000014366	Shc3	0.993299
NONRATT016429.2	ENSRNOT00000028487	ENSRNOG00000020970	Rundc3a	0.9933
NONRATT005842.2	ENSRNOT00000013067	ENSRNOG00000009832	Slc39a14	0.99332
NONRATT001282.2	ENSRNOT00000072983	ENSRNOG00000046343	AABR07067896.1	0.99332
NONRATT020829.2	ENSRNOT00000005331	ENSRNOG00000003984	Apln	0.993338
MSTRG.88.2	ENSRNOT00000024765	ENSRNOG00000018337	Caly	0.993345
NONRATT018222.2	ENSRNOT00000004908	ENSRNOG00000003681	Lct	0.993367
NONRATT007205.2	ENSRNOT00000064130	ENSRNOG00000042292	AABR07004993.1	0.993411
NONRATT022693.2	ENSRNOT00000012667	ENSRNOG00000009503	Depdc1	0.993411
NONRATT017117.2	ENSRNOT00000025582	ENSRNOG00000018854	Nppc	0.993419
NONRATT016976.2	ENSRNOT00000013005	ENSRNOG00000009660	Enpp6	0.993423
MSTRG.15013.1	ENSRNOT00000000018	ENSRNOG00000000017	Steap1	0.993433
NONRATT030326.2	ENSRNOT00000032306	ENSRNOG00000027942	Eps8l1	0.993438
NONRATT020090.2	ENSRNOT00000019963	ENSRNOG00000014790	Cryga	0.993459
NONRATT029495.2	ENSRNOT00000047685	ENSRNOG00000014751	Ret	0.99346
MSTRG.11448.4	ENSRNOT00000001860	ENSRNOG00000001378	Iqcd	0.993486
NONRATT022689.2	ENSRNOT00000002776	ENSRNOG00000002031	Naa11	0.993492
NONRATT002642.2	ENSRNOT00000004908	ENSRNOG00000003681	Lct	0.993496
NONRATT018222.2	ENSRNOT00000029487	ENSRNOG00000020578	Ceacam1	0.993522
ENSRNOT00000080938	ENSRNOT00000000018	ENSRNOG00000000017	Steap1	0.993534
NONRATT016850.2	ENSRNOT00000068148	ENSRNOG00000002385	Prg4	0.993537
NONRATT005361.2	ENSRNOT00000004908	ENSRNOG00000003681	Lct	0.993539
NONRATT010212.2	ENSRNOT00000080493	ENSRNOG00000058207	Olr1332	0.993553
MSTRG.11448.4	ENSRNOT00000013119	ENSRNOG00000032832	Mmp10	0.993575
NONRATT028416.2	ENSRNOT00000022497	ENSRNOG00000016760	Kctd19	0.993578
MSTRG.12799.3	ENSRNOT00000000523	ENSRNOG00000000451	RT1-Ba	0.993579
NONRATT003389.2	ENSRNOT00000085265	ENSRNOG00000052080	Camk2b	0.993587
MSTRG.2420.1	ENSRNOT00000011945	ENSRNOG00000008816	Gpnmb	0.993589
NONRATT015869.2	ENSRNOT00000012310	ENSRNOG00000032626	Mmp3	0.993605
MSTRG.17916.1	ENSRNOT00000012310	ENSRNOG00000032626	Mmp3	0.993606
ENSRNOT00000082061	ENSRNOT00000012310	ENSRNOG00000032626	Mmp3	0.993607
NONRATT027876.2	ENSRNOT00000005331	ENSRNOG00000003984	Apln	0.993642
NONRATT019275.2	ENSRNOT00000015029	ENSRNOG00000033564	Cfd	0.993644
NONRATT005842.2	ENSRNOT00000014035	ENSRNOG00000010490	Hes2	0.993658
NONRATT011233.2	ENSRNOT00000061720	ENSRNOG00000000060	Cplx1	0.993682
NONRATT007552.2	ENSRNOT00000025582	ENSRNOG00000018854	Nppc	0.993711
NONRATT028680.2	ENSRNOT00000007806	ENSRNOG00000005858	Kap	0.993728
NONRATT000173.2	ENSRNOT00000088665	ENSRNOG00000049642	Smim5	0.993742
NONRATT020090.2	ENSRNOT00000072983	ENSRNOG00000046343	AABR07067896.1	0.993742
NONRATT019275.2	ENSRNOT00000016540	ENSRNOG00000012404	Thrsp	0.99375
MSTRG.15013.1	ENSRNOT00000084220	ENSRNOG00000053889	Celsr3	0.993752
NONRATT017442.2	ENSRNOT00000025300	ENSRNOG00000023172	Dnajb3	0.99377
NONRATT000173.2	ENSRNOT00000091688	ENSRNOG00000060355	Hist1h1b	0.993782
NONRATT002323.2	ENSRNOT00000005583	ENSRNOG00000004171	Dnah9	0.993807
NONRATT028730.2	ENSRNOT00000039210	ENSRNOG00000042860	Pappa2	0.993838
NONRATT011314.2	ENSRNOT00000003567	ENSRNOG00000002525	Ptgs2	0.993841
MSTRG.15332.1	ENSRNOT00000091317	ENSRNOG00000022802	Tmem184b	0.993845
NONRATT027338.2	ENSRNOT00000078507	ENSRNOG00000033215	RT1-Db1	0.993846
NONRATT014819.2	ENSRNOT00000071387	ENSRNOG00000049054	Ntsr2	0.993847
MSTRG.88.2	ENSRNOT00000075349	ENSRNOG00000047891	Foxg1	0.993853
ENSRNOT00000080938	ENSRNOT00000084220	ENSRNOG00000053889	Celsr3	0.993864
MSTRG.11448.4	ENSRNOT00000012310	ENSRNOG00000032626	Mmp3	0.993872
NONRATT023654.2	ENSRNOT00000045773	ENSRNOG00000030547	Dpp6	0.993877
NONRATT020090.2	ENSRNOT00000027681	ENSRNOG00000020424	Ppapdc1a	0.993885
NONRATT022689.2	ENSRNOT00000012196	ENSRNOG00000009172	Cpvl	0.99389
NONRATT013950.2	ENSRNOT00000015084	ENSRNOG00000011160	Sv2b	0.993901
NONRATT015791.2	ENSRNOT00000076780	ENSRNOG00000011160	Sv2b	0.993904
NONRATT030662.2	ENSRNOT00000008613	ENSRNOG00000006367	Slc5a8	0.993915
NONRATT030524.2	ENSRNOT00000019442	ENSRNOG00000014366	Shc3	0.993929
NONRATT003540.2	ENSRNOT00000001860	ENSRNOG00000001378	Iqcd	0.993934
NONRATT000035.2	ENSRNOT00000028487	ENSRNOG00000020970	Rundc3a	0.993934
ENSRNOT00000077676	ENSRNOT00000076904	ENSRNOG00000046790	Irs4	0.993959
NONRATT005842.2	ENSRNOT00000021901	ENSRNOG00000016295	Lyzl1	0.993962
NONRATT005561.2	ENSRNOT00000084220	ENSRNOG00000053889	Celsr3	0.993985
NONRATT014819.2	ENSRNOT00000081484	ENSRNOG00000011351	Mat1a	0.994003
NONRATT000004.2	ENSRNOT00000001593	ENSRNOG00000001201	Cstb	0.994008
NONRATT017207.2	ENSRNOT00000037752	ENSRNOG00000028404	Ppp1r1b	0.994009
NONRATT008391.2	ENSRNOT00000080493	ENSRNOG00000058207	Olr1332	0.994046
ENSRNOT00000079713	ENSRNOT00000080525	ENSRNOG00000058568	Dhrs9	0.99412
NONRATT026138.2	ENSRNOT00000027681	ENSRNOG00000020424	Ppapdc1a	0.994122
NONRATT018768.2	ENSRNOT00000032306	ENSRNOG00000027942	Eps8l1	0.994127
NONRATT031078.2	ENSRNOT00000076780	ENSRNOG00000011160	Sv2b	0.994139
NONRATT023367.2	ENSRNOT00000013119	ENSRNOG00000032832	Mmp10	0.994143
NONRATT022927.2	ENSRNOT00000019080	ENSRNOG00000014008	Mfsd2a	0.994146
NONRATT023125.2	ENSRNOT00000016568	ENSRNOG00000011548	Ebf2	0.994147
MSTRG.2582.1	ENSRNOT00000027681	ENSRNOG00000020424	Ppapdc1a	0.994149
ENSRNOT00000090546	ENSRNOT00000011945	ENSRNOG00000008816	Gpnmb	0.994152
NONRATT026525.2	ENSRNOT00000012844	ENSRNOG00000009691	Lrrn2	0.994163
NONRATT003540.2	ENSRNOT00000011945	ENSRNOG00000008816	Gpnmb	0.994179
NONRATT020014.2	ENSRNOT00000087403	ENSRNOG00000058904	Tex13	0.99418
NONRATT030693.2	ENSRNOT00000080493	ENSRNOG00000058207	Olr1332	0.994184
NONRATT016935.2	ENSRNOT00000060097	ENSRNOG00000020030	Crlf1	0.994186
NONRATT023133.2	ENSRNOT00000045773	ENSRNOG00000030547	Dpp6	0.994207
NONRATT006496.2	ENSRNOT00000003248	ENSRNOG00000002343	Uchl1	0.994223
NONRATT012664.2	ENSRNOT00000001162	ENSRNOG00000000871	Cd40lg	0.994225
MSTRG.460.5	ENSRNOT00000080493	ENSRNOG00000058207	Olr1332	0.994261
MSTRG.5414.4	ENSRNOT00000072460	ENSRNOG00000049961	AABR07037923.2	0.994265
ENSRNOT00000090050	ENSRNOT00000080493	ENSRNOG00000058207	Olr1332	0.994268
NONRATT001948.2	ENSRNOT00000080493	ENSRNOG00000058207	Olr1332	0.994268
NONRATT002900.2	ENSRNOT00000080493	ENSRNOG00000058207	Olr1332	0.994268
NONRATT003529.2	ENSRNOT00000080493	ENSRNOG00000058207	Olr1332	0.994268
NONRATT003607.2	ENSRNOT00000080493	ENSRNOG00000058207	Olr1332	0.994268
NONRATT021201.2	ENSRNOT00000080493	ENSRNOG00000058207	Olr1332	0.994268
NONRATT021694.2	ENSRNOT00000080493	ENSRNOG00000058207	Olr1332	0.994268
NONRATT030878.2	ENSRNOT00000080493	ENSRNOG00000058207	Olr1332	0.994268
NONRATT030984.2	ENSRNOT00000080493	ENSRNOG00000058207	Olr1332	0.994268
MSTRG.10244.2	ENSRNOT00000080493	ENSRNOG00000058207	Olr1332	0.994268
MSTRG.11449.2	ENSRNOT00000080493	ENSRNOG00000058207	Olr1332	0.994268
MSTRG.11597.1	ENSRNOT00000080493	ENSRNOG00000058207	Olr1332	0.994268
MSTRG.11664.1	ENSRNOT00000080493	ENSRNOG00000058207	Olr1332	0.994268
MSTRG.6537.3	ENSRNOT00000080493	ENSRNOG00000058207	Olr1332	0.994268
ENSRNOT00000079713	ENSRNOT00000050279	ENSRNOG00000031521	Cldn24	0.994274
NONRATT000004.2	ENSRNOT00000000018	ENSRNOG00000000017	Steap1	0.994306
MSTRG.2582.1	ENSRNOT00000019963	ENSRNOG00000014790	Cryga	0.994324
NONRATT018944.2	ENSRNOT00000029487	ENSRNOG00000020578	Ceacam1	0.994332
NONRATT008278.2	ENSRNOT00000003567	ENSRNOG00000002525	Ptgs2	0.994333
NONRATT029937.2	ENSRNOT00000004908	ENSRNOG00000003681	Lct	0.994348
NONRATT022927.2	ENSRNOT00000001211	ENSRNOG00000000903	Asl	0.994363
NONRATT008375.2	ENSRNOT00000010831	ENSRNOG00000008074	Cyp11a1	0.994365
NONRATT023367.2	ENSRNOT00000076904	ENSRNOG00000046790	Irs4	0.994365
NONRATT008312.2	ENSRNOT00000003691	ENSRNOG00000002643	Ugdh	0.994366
NONRATT004493.2	ENSRNOT00000014762	ENSRNOG00000010891	Lrrcc1	0.994383
NONRATT026398.2	ENSRNOT00000072983	ENSRNOG00000046343	AABR07067896.1	0.994387
MSTRG.14660.1	ENSRNOT00000005331	ENSRNOG00000003984	Apln	0.994392
ENSRNOT00000079713	ENSRNOT00000033953	ENSRNOG00000023092	Prss54	0.994402
NONRATT021848.2	ENSRNOT00000072100	ENSRNOG00000046239	LOC100909612	0.994409
NONRATT021848.2	ENSRNOT00000004900	ENSRNOG00000003580	Ucp1	0.994412
NONRATT022693.2	ENSRNOT00000013423	ENSRNOG00000009875	Akr1b7	0.994415
NONRATT016976.2	ENSRNOT00000031734	ENSRNOG00000016737	Tcerg1l	0.994421
NONRATT008278.2	ENSRNOT00000065349	ENSRNOG00000000479	Kifc1	0.994426
NONRATT008852.2	ENSRNOT00000001211	ENSRNOG00000000903	Asl	0.994426
NONRATT022693.2	ENSRNOT00000079371	ENSRNOG00000019100	Kif2c	0.994459
NONRATT023983.2	ENSRNOT00000000018	ENSRNOG00000000017	Steap1	0.99446
MSTRG.22618.1	ENSRNOT00000080493	ENSRNOG00000058207	Olr1332	0.994481
NONRATT030662.2	ENSRNOT00000052130	ENSRNOG00000030914	RGD1559493	0.994495
NONRATT016850.2	ENSRNOT00000040731	ENSRNOG00000030889	Cldn22	0.994501
NONRATT005842.2	ENSRNOT00000079690	ENSRNOG00000053095	Rn60_20_0051.7	0.994502
NONRATT013518.2	ENSRNOT00000080493	ENSRNOG00000058207	Olr1332	0.994514
NONRATT006607.2	ENSRNOT00000013423	ENSRNOG00000009875	Akr1b7	0.994521
NONRATT009960.2	ENSRNOT00000012667	ENSRNOG00000009503	Depdc1	0.994526
NONRATT008278.2	ENSRNOT00000019963	ENSRNOG00000014790	Cryga	0.99453
NONRATT014530.2	ENSRNOT00000091155	ENSRNOG00000007092	Fgb	0.99453
NONRATT003829.2	ENSRNOT00000080493	ENSRNOG00000058207	Olr1332	0.994531
MSTRG.6245.1	ENSRNOT00000021901	ENSRNOG00000016295	Lyzl1	0.994536
NONRATT023367.2	ENSRNOT00000011945	ENSRNOG00000008816	Gpnmb	0.994544
NONRATT026398.2	ENSRNOT00000080493	ENSRNOG00000058207	Olr1332	0.994564
NONRATT003305.2	ENSRNOT00000019080	ENSRNOG00000014008	Mfsd2a	0.994573
NONRATT004897.2	ENSRNOT00000024765	ENSRNOG00000018337	Caly	0.994603
NONRATT017226.2	ENSRNOT00000052130	ENSRNOG00000030914	RGD1559493	0.994603
NONRATT031141.2	ENSRNOT00000040731	ENSRNOG00000030889	Cldn22	0.994607
NONRATT010212.2	ENSRNOT00000079371	ENSRNOG00000019100	Kif2c	0.994625
NONRATT005891.2	ENSRNOT00000074384	ENSRNOG00000049388	Prr32	0.994626
NONRATT010212.2	ENSRNOT00000087403	ENSRNOG00000058904	Tex13	0.994634
NONRATT023367.2	ENSRNOT00000012310	ENSRNOG00000032626	Mmp3	0.994646
NONRATT022029.2	ENSRNOT00000085265	ENSRNOG00000052080	Camk2b	0.994648
NONRATT031141.2	ENSRNOT00000003691	ENSRNOG00000002643	Ugdh	0.994649
NONRATT026138.2	ENSRNOT00000080493	ENSRNOG00000058207	Olr1332	0.994649
NONRATT002972.2	ENSRNOT00000082688	ENSRNOG00000024237	Scel	0.994655
NONRATT003284.2	ENSRNOT00000088481	ENSRNOG00000008165	Tpx2	0.994658
MSTRG.8246.4	ENSRNOT00000079690	ENSRNOG00000053095	Rn60_20_0051.7	0.99466
NONRATT013083.2	ENSRNOT00000088851	ENSRNOG00000055769	1810024B03Rik	0.994661
NONRATT021848.2	ENSRNOT00000085265	ENSRNOG00000052080	Camk2b	0.99467
NONRATT028049.2	ENSRNOT00000085265	ENSRNOG00000052080	Camk2b	0.994686
NONRATT016976.2	ENSRNOT00000063995	ENSRNOG00000002471	Polq	0.994728
NONRATT027050.2	ENSRNOT00000076780	ENSRNOG00000011160	Sv2b	0.994734
MSTRG.5414.4	ENSRNOT00000080493	ENSRNOG00000058207	Olr1332	0.994736
NONRATT006607.2	ENSRNOT00000019963	ENSRNOG00000014790	Cryga	0.994739
MSTRG.6245.1	ENSRNOT00000012310	ENSRNOG00000032626	Mmp3	0.994743
NONRATT018129.2	ENSRNOT00000091175	ENSRNOG00000053037	AABR07024139.1	0.994744
NONRATT002642.2	ENSRNOT00000018447	ENSRNOG00000013552	Scd1	0.994745
MSTRG.6245.1	ENSRNOT00000035252	ENSRNOG00000023601	Elavl4	0.994753
ENSRNOT00000080938	ENSRNOT00000003691	ENSRNOG00000002643	Ugdh	0.994761
NONRATT014530.2	ENSRNOT00000078348	ENSRNOG00000059579	Gpt2	0.994773
NONRATT011067.2	ENSRNOT00000019075	ENSRNOG00000014252	Irf2bp1	0.994782
NONRATT003860.2	ENSRNOT00000076409	ENSRNOG00000051147	Rn60_2_1765.1	0.994788
NONRATT016429.2	ENSRNOT00000011945	ENSRNOG00000008816	Gpnmb	0.994805
ENSRNOT00000077676	ENSRNOT00000028082	ENSRNOG00000020686	Dkkl1	0.994814
NONRATT003284.2	ENSRNOT00000085880	ENSRNOG00000018929	Kif20b	0.994823
NONRATT023367.2	ENSRNOT00000061176	ENSRNOG00000026037	Plb1	0.994829
NONRATT027338.2	ENSRNOT00000088665	ENSRNOG00000049642	Smim5	0.994834
NONRATT021848.2	ENSRNOT00000081951	ENSRNOG00000008310	Mpo	0.994835
NONRATT021848.2	ENSRNOT00000065759	ENSRNOG00000015086	Plin1	0.994835
NONRATT021848.2	ENSRNOT00000091197	ENSRNOG00000001001	Retn	0.994835
NONRATT021848.2	ENSRNOT00000038311	ENSRNOG00000009610	Tchhl1	0.994835
MSTRG.15013.1	ENSRNOT00000003691	ENSRNOG00000002643	Ugdh	0.994839
NONRATT022693.2	ENSRNOT00000089332	ENSRNOG00000042860	Pappa2	0.994849
NONRATT020090.2	ENSRNOT00000021320	ENSRNOG00000015921	Esco2	0.99486
NONRATT020090.2	ENSRNOT00000083849	ENSRNOG00000053795	SNORD45	0.99486
NONRATT016976.2	ENSRNOT00000079371	ENSRNOG00000019100	Kif2c	0.994877
NONRATT019066.2	ENSRNOT00000037444	ENSRNOG00000021555	Mis18a	0.994878
NONRATT002073.2	ENSRNOT00000086653	ENSRNOG00000011654	Plk4	0.994879
MSTRG.17916.1	ENSRNOT00000036656	ENSRNOG00000022863	Lingo4	0.994891
NONRATT003540.2	ENSRNOT00000036656	ENSRNOG00000022863	Lingo4	0.994893
NONRATT001520.2	ENSRNOT00000080493	ENSRNOG00000058207	Olr1332	0.994912
NONRATT023367.2	ENSRNOT00000028082	ENSRNOG00000020686	Dkkl1	0.994917
NONRATT000035.2	ENSRNOT00000014035	ENSRNOG00000010490	Hes2	0.994924
NONRATT000603.2	ENSRNOT00000076780	ENSRNOG00000011160	Sv2b	0.994946
NONRATT008422.2	ENSRNOT00000019080	ENSRNOG00000014008	Mfsd2a	0.994949
NONRATT022693.2	ENSRNOT00000072460	ENSRNOG00000049961	AABR07037923.2	0.994979
NONRATT021848.2	ENSRNOT00000029487	ENSRNOG00000020578	Ceacam1	0.994987
NONRATT010673.2	ENSRNOT00000072983	ENSRNOG00000046343	AABR07067896.1	0.995003
NONRATT000035.2	ENSRNOT00000021901	ENSRNOG00000016295	Lyzl1	0.995008
NONRATT009963.2	ENSRNOT00000033443	ENSRNOG00000028025	Aknad1	0.995019
NONRATT027876.2	ENSRNOT00000013322	ENSRNOG00000009712	Gale	0.995028
NONRATT014819.2	ENSRNOT00000082156	ENSRNOG00000025608	Lrat	0.995031
NONRATT002972.2	ENSRNOT00000014035	ENSRNOG00000010490	Hes2	0.995033
NONRATT026516.2	ENSRNOT00000012196	ENSRNOG00000009172	Cpvl	0.99504
NONRATT002185.2	ENSRNOT00000087403	ENSRNOG00000058904	Tex13	0.995042
NONRATT016832.2	ENSRNOT00000055200	ENSRNOG00000036802	Snhg11	0.995052
NONRATT021426.2	ENSRNOT00000002776	ENSRNOG00000002031	Naa11	0.995059
NONRATT026733.2	ENSRNOT00000051892	ENSRNOG00000020578	Ceacam1	0.995075
MSTRG.460.3	ENSRNOT00000072983	ENSRNOG00000046343	AABR07067896.1	0.995084
NONRATT008391.2	ENSRNOT00000087403	ENSRNOG00000058904	Tex13	0.995113
NONRATT028848.2	ENSRNOT00000072100	ENSRNOG00000046239	LOC100909612	0.995116
NONRATT009960.2	ENSRNOT00000065349	ENSRNOG00000000479	Kifc1	0.995122
NONRATT022456.2	ENSRNOT00000079690	ENSRNOG00000053095	Rn60_20_0051.7	0.995136
NONRATT015869.2	ENSRNOT00000035252	ENSRNOG00000023601	Elavl4	0.995146
NONRATT010673.2	ENSRNOT00000087403	ENSRNOG00000058904	Tex13	0.995148
ENSRNOT00000082061	ENSRNOT00000035252	ENSRNOG00000023601	Elavl4	0.995149
NONRATT006607.2	ENSRNOT00000089332	ENSRNOG00000042860	Pappa2	0.995151
MSTRG.14660.1	ENSRNOT00000091175	ENSRNOG00000053037	AABR07024139.1	0.995154
MSTRG.17916.1	ENSRNOT00000021901	ENSRNOG00000016295	Lyzl1	0.995182
NONRATT003389.2	ENSRNOT00000029487	ENSRNOG00000020578	Ceacam1	0.995188
MSTRG.450.4	ENSRNOT00000087403	ENSRNOG00000058904	Tex13	0.99522
NONRATT014467.2	ENSRNOT00000057898	ENSRNOG00000038047	Mt1	0.995223
NONRATT022693.2	ENSRNOT00000021320	ENSRNOG00000015921	Esco2	0.995239
NONRATT022693.2	ENSRNOT00000083849	ENSRNOG00000053795	SNORD45	0.995239
MSTRG.6245.1	ENSRNOT00000028487	ENSRNOG00000020970	Rundc3a	0.995244
NONRATT026516.2	ENSRNOT00000072922	ENSRNOG00000049851	Fmo6	0.995247
NONRATT004936.2	ENSRNOT00000047685	ENSRNOG00000014751	Ret	0.99525
NONRATT000537.2	ENSRNOT00000088204	ENSRNOG00000056209	Exo1	0.995252
NONRATT026398.2	ENSRNOT00000027681	ENSRNOG00000020424	Ppapdc1a	0.995253
NONRATT027425.2	ENSRNOT00000050279	ENSRNOG00000031521	Cldn24	0.995266
NONRATT020829.2	ENSRNOT00000013322	ENSRNOG00000009712	Gale	0.995278
MSTRG.2582.1	ENSRNOT00000021320	ENSRNOG00000015921	Esco2	0.99528
MSTRG.2582.1	ENSRNOT00000083849	ENSRNOG00000053795	SNORD45	0.99528
NONRATT023983.2	ENSRNOT00000028082	ENSRNOG00000020686	Dkkl1	0.995287
MSTRG.6245.1	ENSRNOT00000001860	ENSRNOG00000001378	Iqcd	0.995304
NONRATT029310.2	ENSRNOT00000039954	ENSRNOG00000010031	Vtn	0.995316
ENSRNOT00000082061	ENSRNOT00000001860	ENSRNOG00000001378	Iqcd	0.995336
NONRATT016307.2	ENSRNOT00000004908	ENSRNOG00000003681	Lct	0.995339
NONRATT015869.2	ENSRNOT00000001860	ENSRNOG00000001378	Iqcd	0.995342
NONRATT020090.2	ENSRNOT00000072460	ENSRNOG00000049961	AABR07037923.2	0.995349
MSTRG.5414.4	ENSRNOT00000019963	ENSRNOG00000014790	Cryga	0.995364
NONRATT022456.2	ENSRNOT00000014035	ENSRNOG00000010490	Hes2	0.995365
NONRATT016429.2	ENSRNOT00000013119	ENSRNOG00000032832	Mmp10	0.995382
NONRATT012845.2	ENSRNOT00000044638	ENSRNOG00000005307	Slc4a10	0.995388
NONRATT028416.2	ENSRNOT00000085898	ENSRNOG00000059010	Rnf212	0.995398
NONRATT005357.2	ENSRNOT00000022012	ENSRNOG00000016148	Gtse1	0.995401
NONRATT008391.2	ENSRNOT00000072983	ENSRNOG00000046343	AABR07067896.1	0.995401
NONRATT022029.2	ENSRNOT00000016568	ENSRNOG00000011548	Ebf2	0.995421
MSTRG.460.3	ENSRNOT00000027681	ENSRNOG00000020424	Ppapdc1a	0.995422
NONRATT020090.2	ENSRNOT00000013423	ENSRNOG00000009875	Akr1b7	0.995481
NONRATT019836.2	ENSRNOT00000033700	ENSRNOG00000023603	Amer3	0.995485
MSTRG.15332.1	ENSRNOT00000002776	ENSRNOG00000002031	Naa11	0.995486
NONRATT031141.2	ENSRNOT00000013322	ENSRNOG00000009712	Gale	0.995492
NONRATT007250.2	ENSRNOT00000090853	ENSRNOG00000057832	Rnf125	0.995497
NONRATT007580.2	ENSRNOT00000008613	ENSRNOG00000006367	Slc5a8	0.995506
NONRATT026117.2	ENSRNOT00000025746	ENSRNOG00000019017	Gstm6	0.995508
NONRATT001524.2	ENSRNOT00000087403	ENSRNOG00000058904	Tex13	0.995533
MSTRG.2420.1	ENSRNOT00000076904	ENSRNOG00000046790	Irs4	0.995546
NONRATT021496.2	ENSRNOT00000080512	ENSRNOG00000007014	Cnksr2	0.995553
MSTRG.460.5	ENSRNOT00000087403	ENSRNOG00000058904	Tex13	0.995559
NONRATT007465.2	ENSRNOT00000077308	ENSRNOG00000061153	Hrh3	0.99557
NONRATT025255.2	ENSRNOT00000003691	ENSRNOG00000002643	Ugdh	0.995579
NONRATT020090.2	ENSRNOT00000089332	ENSRNOG00000042860	Pappa2	0.995594
NONRATT002972.2	ENSRNOT00000001860	ENSRNOG00000001378	Iqcd	0.995601
NONRATT010946.2	ENSRNOT00000015716	ENSRNOG00000011427	Hr	0.99563
NONRATT007430.2	ENSRNOT00000077275	ENSRNOG00000059579	Gpt2	0.995638
NONRATT030901.2	ENSRNOT00000072100	ENSRNOG00000046239	LOC100909612	0.995645
NONRATT006607.2	ENSRNOT00000021320	ENSRNOG00000015921	Esco2	0.995655
NONRATT006607.2	ENSRNOT00000083849	ENSRNOG00000053795	SNORD45	0.995655
NONRATT020616.2	ENSRNOT00000002776	ENSRNOG00000002031	Naa11	0.995656
NONRATT028730.2	ENSRNOT00000087403	ENSRNOG00000058904	Tex13	0.99567
NONRATT009210.2	ENSRNOT00000080512	ENSRNOG00000007014	Cnksr2	0.995699
NONRATT025797.2	ENSRNOT00000002776	ENSRNOG00000002031	Naa11	0.995699
NONRATT030901.2	ENSRNOT00000085265	ENSRNOG00000052080	Camk2b	0.995717
MSTRG.11448.4	ENSRNOT00000035252	ENSRNOG00000023601	Elavl4	0.995728
NONRATT011876.2	ENSRNOT00000016554	ENSRNOG00000012390	Npw	0.995738
NONRATT018222.2	ENSRNOT00000018447	ENSRNOG00000013552	Scd1	0.995743
NONRATT030662.2	ENSRNOT00000047685	ENSRNOG00000014751	Ret	0.99577
NONRATT008278.2	ENSRNOT00000079371	ENSRNOG00000019100	Kif2c	0.995806
ENSRNOT00000077676	ENSRNOT00000000018	ENSRNOG00000000017	Steap1	0.995809
NONRATT022927.2	ENSRNOT00000078348	ENSRNOG00000059579	Gpt2	0.995818
ENSRNOT00000080938	ENSRNOT00000040731	ENSRNOG00000030889	Cldn22	0.995826
NONRATT030901.2	ENSRNOT00000081951	ENSRNOG00000008310	Mpo	0.99584
NONRATT030901.2	ENSRNOT00000065759	ENSRNOG00000015086	Plin1	0.99584
NONRATT030901.2	ENSRNOT00000091197	ENSRNOG00000001001	Retn	0.99584
NONRATT030901.2	ENSRNOT00000038311	ENSRNOG00000009610	Tchhl1	0.99584
MSTRG.2582.1	ENSRNOT00000013423	ENSRNOG00000009875	Akr1b7	0.995845
NONRATT018825.2	ENSRNOT00000044638	ENSRNOG00000005307	Slc4a10	0.995856
ENSRNOT00000077676	ENSRNOT00000078348	ENSRNOG00000059579	Gpt2	0.995857
NONRATT016307.2	ENSRNOT00000018447	ENSRNOG00000013552	Scd1	0.995858
MSTRG.2420.1	ENSRNOT00000028082	ENSRNOG00000020686	Dkkl1	0.995861
NONRATT012868.2	ENSRNOT00000038228	ENSRNOG00000027787	Cdc6	0.995863
NONRATT003329.2	ENSRNOT00000085265	ENSRNOG00000052080	Camk2b	0.995875
MSTRG.15013.1	ENSRNOT00000040731	ENSRNOG00000030889	Cldn22	0.995892
NONRATT030503.2	ENSRNOT00000012196	ENSRNOG00000009172	Cpvl	0.995933
NONRATT026583.2	ENSRNOT00000064130	ENSRNOG00000042292	AABR07004993.1	0.995936
NONRATT003329.2	ENSRNOT00000018447	ENSRNOG00000013552	Scd1	0.995937
MSTRG.462.3	ENSRNOT00000005797	ENSRNOG00000004278	Dlx3	0.995947
NONRATT028049.2	ENSRNOT00000072100	ENSRNOG00000046239	LOC100909612	0.995952
ENSRNOT00000077676	ENSRNOT00000005331	ENSRNOG00000003984	Apln	0.995963
NONRATT025255.2	ENSRNOT00000005331	ENSRNOG00000003984	Apln	0.995965
NONRATT003540.2	ENSRNOT00000028487	ENSRNOG00000020970	Rundc3a	0.995967
MSTRG.2420.1	ENSRNOT00000084220	ENSRNOG00000053889	Celsr3	0.995969
NONRATT023367.2	ENSRNOT00000036656	ENSRNOG00000022863	Lingo4	0.995989
MSTRG.2582.1	ENSRNOT00000089332	ENSRNOG00000042860	Pappa2	0.996001
NONRATT011314.2	ENSRNOT00000079371	ENSRNOG00000019100	Kif2c	0.996003
NONRATT025797.2	ENSRNOT00000012196	ENSRNOG00000009172	Cpvl	0.996015
NONRATT001131.2	ENSRNOT00000013322	ENSRNOG00000009712	Gale	0.996035
NONRATT001520.2	ENSRNOT00000072983	ENSRNOG00000046343	AABR07067896.1	0.996038
NONRATT024188.2	ENSRNOT00000072100	ENSRNOG00000046239	LOC100909612	0.996063
MSTRG.5414.4	ENSRNOT00000021320	ENSRNOG00000015921	Esco2	0.996067
MSTRG.5414.4	ENSRNOT00000083849	ENSRNOG00000053795	SNORD45	0.996067
NONRATT024018.2	ENSRNOT00000080493	ENSRNOG00000058207	Olr1332	0.99607
NONRATT029667.2	ENSRNOT00000090853	ENSRNOG00000057832	Rnf125	0.996075
NONRATT013083.2	ENSRNOT00000078919	ENSRNOG00000061414	Acot12	0.996082
NONRATT030901.2	ENSRNOT00000004900	ENSRNOG00000003580	Ucp1	0.99609
NONRATT028049.2	ENSRNOT00000081951	ENSRNOG00000008310	Mpo	0.996098
NONRATT028049.2	ENSRNOT00000065759	ENSRNOG00000015086	Plin1	0.996098
NONRATT028049.2	ENSRNOT00000091197	ENSRNOG00000001001	Retn	0.996098
NONRATT028049.2	ENSRNOT00000038311	ENSRNOG00000009610	Tchhl1	0.996098
NONRATT023983.2	ENSRNOT00000076904	ENSRNOG00000046790	Irs4	0.996107
NONRATT014530.2	ENSRNOT00000003691	ENSRNOG00000002643	Ugdh	0.996122
NONRATT012845.2	ENSRNOT00000082533	ENSRNOG00000053406	Gramd1c	0.996138
NONRATT016307.2	ENSRNOT00000085265	ENSRNOG00000052080	Camk2b	0.996141
NONRATT002685.2	ENSRNOT00000085898	ENSRNOG00000059010	Rnf212	0.996158
NONRATT026398.2	ENSRNOT00000072460	ENSRNOG00000049961	AABR07037923.2	0.996159
NONRATT004637.2	ENSRNOT00000025903	ENSRNOG00000019100	Kif2c	0.996161
NONRATT014467.2	ENSRNOT00000009813	ENSRNOG00000007092	Fgb	0.996162
NONRATT003540.2	ENSRNOT00000028082	ENSRNOG00000020686	Dkkl1	0.996162
NONRATT010212.2	ENSRNOT00000012667	ENSRNOG00000009503	Depdc1	0.996174
NONRATT015771.2	ENSRNOT00000000523	ENSRNOG00000000451	RT1-Ba	0.996185
NONRATT019066.2	ENSRNOT00000070886	ENSRNOG00000047864	RT1-DMa	0.996185
NONRATT024188.2	ENSRNOT00000085265	ENSRNOG00000052080	Camk2b	0.99619
NONRATT029655.2	ENSRNOT00000015029	ENSRNOG00000033564	Cfd	0.996193
NONRATT000035.2	ENSRNOT00000045156	ENSRNOG00000033803	Rpl37	0.996243
NONRATT015869.2	ENSRNOT00000011945	ENSRNOG00000008816	Gpnmb	0.996247
ENSRNOT00000082061	ENSRNOT00000011945	ENSRNOG00000008816	Gpnmb	0.996251
NONRATT028339.2	ENSRNOT00000015029	ENSRNOG00000033564	Cfd	0.996286
MSTRG.15013.1	ENSRNOT00000091175	ENSRNOG00000053037	AABR07024139.1	0.996287
NONRATT005621.2	ENSRNOT00000080493	ENSRNOG00000058207	Olr1332	0.996299
NONRATT012705.2	ENSRNOT00000013119	ENSRNOG00000032832	Mmp10	0.996312
NONRATT022693.2	ENSRNOT00000031734	ENSRNOG00000016737	Tcerg1l	0.996316
ENSRNOT00000080938	ENSRNOT00000091175	ENSRNOG00000053037	AABR07024139.1	0.996351
NONRATT022456.2	ENSRNOT00000001860	ENSRNOG00000001378	Iqcd	0.996352
NONRATT007998.2	ENSRNOT00000020017	ENSRNOG00000014761	Rasd2	0.996356
NONRATT012180.2	ENSRNOT00000018447	ENSRNOG00000013552	Scd1	0.996356
NONRATT002972.2	ENSRNOT00000079690	ENSRNOG00000053095	Rn60_20_0051.7	0.996373
NONRATT025014.2	ENSRNOT00000004908	ENSRNOG00000003681	Lct	0.996378
NONRATT022282.2	ENSRNOT00000015084	ENSRNOG00000011160	Sv2b	0.996407
MSTRG.460.3	ENSRNOT00000072460	ENSRNOG00000049961	AABR07037923.2	0.996413
NONRATT028049.2	ENSRNOT00000004900	ENSRNOG00000003580	Ucp1	0.996415
NONRATT010212.2	ENSRNOT00000072460	ENSRNOG00000049961	AABR07037923.2	0.996423
NONRATT012710.2	ENSRNOT00000063995	ENSRNOG00000002471	Polq	0.996427
MSTRG.22618.1	ENSRNOT00000087403	ENSRNOG00000058904	Tex13	0.996429
NONRATT020911.2	ENSRNOT00000085265	ENSRNOG00000052080	Camk2b	0.99643
NONRATT022693.2	ENSRNOT00000019963	ENSRNOG00000014790	Cryga	0.996443
ENSRNOT00000077676	ENSRNOT00000084220	ENSRNOG00000053889	Celsr3	0.996448
NONRATT003293.2	ENSRNOT00000072983	ENSRNOG00000046343	AABR07067896.1	0.996451
NONRATT026744.2	ENSRNOT00000040038	ENSRNOG00000030478	AY172581.9	0.996454
NONRATT001282.2	ENSRNOT00000072460	ENSRNOG00000049961	AABR07037923.2	0.996475
NONRATT016429.2	ENSRNOT00000000018	ENSRNOG00000000017	Steap1	0.996499
NONRATT012705.2	ENSRNOT00000036656	ENSRNOG00000022863	Lingo4	0.9965
NONRATT028848.2	ENSRNOT00000004900	ENSRNOG00000003580	Ucp1	0.996507
NONRATT030618.2	ENSRNOT00000010990	ENSRNOG00000025898	LOC690142	0.996525
MSTRG.15013.1	ENSRNOT00000005331	ENSRNOG00000003984	Apln	0.996528
NONRATT027876.2	ENSRNOT00000003691	ENSRNOG00000002643	Ugdh	0.996529
NONRATT030693.2	ENSRNOT00000072983	ENSRNOG00000046343	AABR07067896.1	0.996532
ENSRNOT00000080938	ENSRNOT00000005331	ENSRNOG00000003984	Apln	0.996536
NONRATT014530.2	ENSRNOT00000001211	ENSRNOG00000000903	Asl	0.996578
NONRATT003329.2	ENSRNOT00000004908	ENSRNOG00000003681	Lct	0.996596
MSTRG.21232.1	ENSRNOT00000015029	ENSRNOG00000033564	Cfd	0.996607
NONRATT028716.2	ENSRNOT00000085265	ENSRNOG00000052080	Camk2b	0.996615
MSTRG.11449.2	ENSRNOT00000087403	ENSRNOG00000058904	Tex13	0.996669
MSTRG.10244.2	ENSRNOT00000087403	ENSRNOG00000058904	Tex13	0.996669
MSTRG.11597.1	ENSRNOT00000087403	ENSRNOG00000058904	Tex13	0.996669
MSTRG.11664.1	ENSRNOT00000087403	ENSRNOG00000058904	Tex13	0.996669
MSTRG.6537.3	ENSRNOT00000087403	ENSRNOG00000058904	Tex13	0.996669
ENSRNOT00000090050	ENSRNOT00000087403	ENSRNOG00000058904	Tex13	0.996669
NONRATT001948.2	ENSRNOT00000087403	ENSRNOG00000058904	Tex13	0.996669
NONRATT002900.2	ENSRNOT00000087403	ENSRNOG00000058904	Tex13	0.996669
NONRATT003529.2	ENSRNOT00000087403	ENSRNOG00000058904	Tex13	0.996669
NONRATT003607.2	ENSRNOT00000087403	ENSRNOG00000058904	Tex13	0.996669
NONRATT021201.2	ENSRNOT00000087403	ENSRNOG00000058904	Tex13	0.996669
NONRATT021694.2	ENSRNOT00000087403	ENSRNOG00000058904	Tex13	0.996669
NONRATT030878.2	ENSRNOT00000087403	ENSRNOG00000058904	Tex13	0.996669
NONRATT030984.2	ENSRNOT00000087403	ENSRNOG00000058904	Tex13	0.996669
NONRATT024018.2	ENSRNOT00000087403	ENSRNOG00000058904	Tex13	0.996671
NONRATT028730.2	ENSRNOT00000089332	ENSRNOG00000042860	Pappa2	0.99668
NONRATT020829.2	ENSRNOT00000003691	ENSRNOG00000002643	Ugdh	0.996681
NONRATT017624.2	ENSRNOT00000016568	ENSRNOG00000011548	Ebf2	0.996704
NONRATT031141.2	ENSRNOT00000077275	ENSRNOG00000059579	Gpt2	0.996717
NONRATT028848.2	ENSRNOT00000081951	ENSRNOG00000008310	Mpo	0.996725
NONRATT028848.2	ENSRNOT00000065759	ENSRNOG00000015086	Plin1	0.996725
NONRATT028848.2	ENSRNOT00000091197	ENSRNOG00000001001	Retn	0.996725
NONRATT028848.2	ENSRNOT00000038311	ENSRNOG00000009610	Tchhl1	0.996725
NONRATT020829.2	ENSRNOT00000040731	ENSRNOG00000030889	Cldn22	0.996727
NONRATT010212.2	ENSRNOT00000021320	ENSRNOG00000015921	Esco2	0.996729
NONRATT010212.2	ENSRNOT00000083849	ENSRNOG00000053795	SNORD45	0.996729
NONRATT008852.2	ENSRNOT00000078348	ENSRNOG00000059579	Gpt2	0.996734
NONRATT027180.2	ENSRNOT00000064113	ENSRNOG00000010497	RGD1305807	0.996741
MSTRG.2582.1	ENSRNOT00000087403	ENSRNOG00000058904	Tex13	0.996745
NONRATT027876.2	ENSRNOT00000078348	ENSRNOG00000059579	Gpt2	0.99675
NONRATT017117.2	ENSRNOT00000077275	ENSRNOG00000059579	Gpt2	0.996751
NONRATT009960.2	ENSRNOT00000079334	ENSRNOG00000053026	Shcbp1	0.996757
NONRATT022693.2	ENSRNOT00000065349	ENSRNOG00000000479	Kifc1	0.996759
NONRATT018825.2	ENSRNOT00000082533	ENSRNOG00000053406	Gramd1c	0.99676
NONRATT020863.2	ENSRNOT00000002776	ENSRNOG00000002031	Naa11	0.996768
NONRATT022689.2	ENSRNOT00000091317	ENSRNOG00000022802	Tmem184b	0.996776
NONRATT016307.2	ENSRNOT00000081951	ENSRNOG00000008310	Mpo	0.996777
NONRATT016307.2	ENSRNOT00000065759	ENSRNOG00000015086	Plin1	0.996777
NONRATT016307.2	ENSRNOT00000091197	ENSRNOG00000001001	Retn	0.996777
NONRATT016307.2	ENSRNOT00000038311	ENSRNOG00000009610	Tchhl1	0.996777
NONRATT028730.2	ENSRNOT00000021320	ENSRNOG00000015921	Esco2	0.996779
NONRATT028730.2	ENSRNOT00000083849	ENSRNOG00000053795	SNORD45	0.996779
NONRATT012705.2	ENSRNOT00000035252	ENSRNOG00000023601	Elavl4	0.996781
NONRATT030901.2	ENSRNOT00000018447	ENSRNOG00000013552	Scd1	0.996782
NONRATT026138.2	ENSRNOT00000072983	ENSRNOG00000046343	AABR07067896.1	0.996789
NONRATT016429.2	ENSRNOT00000091175	ENSRNOG00000053037	AABR07024139.1	0.996798
NONRATT017137.2	ENSRNOT00000087403	ENSRNOG00000058904	Tex13	0.996799
MSTRG.460.3	ENSRNOT00000080493	ENSRNOG00000058207	Olr1332	0.99681
MSTRG.11448.4	ENSRNOT00000036656	ENSRNOG00000022863	Lingo4	0.996825
MSTRG.11575.7	ENSRNOT00000018447	ENSRNOG00000013552	Scd1	0.996834
MSTRG.2442.2	ENSRNOT00000018447	ENSRNOG00000013552	Scd1	0.996834
MSTRG.8858.2	ENSRNOT00000018447	ENSRNOG00000013552	Scd1	0.996834
NONRATT001297.2	ENSRNOT00000018447	ENSRNOG00000013552	Scd1	0.996834
NONRATT005127.2	ENSRNOT00000018447	ENSRNOG00000013552	Scd1	0.996834
NONRATT005145.2	ENSRNOT00000018447	ENSRNOG00000013552	Scd1	0.996834
NONRATT009496.2	ENSRNOT00000018447	ENSRNOG00000013552	Scd1	0.996834
NONRATT015446.2	ENSRNOT00000018447	ENSRNOG00000013552	Scd1	0.996834
NONRATT019196.2	ENSRNOT00000018447	ENSRNOG00000013552	Scd1	0.996834
NONRATT019486.2	ENSRNOT00000018447	ENSRNOG00000013552	Scd1	0.996834
NONRATT019897.2	ENSRNOT00000018447	ENSRNOG00000013552	Scd1	0.996834
NONRATT020509.2	ENSRNOT00000018447	ENSRNOG00000013552	Scd1	0.996834
NONRATT021402.2	ENSRNOT00000018447	ENSRNOG00000013552	Scd1	0.996834
NONRATT021997.2	ENSRNOT00000018447	ENSRNOG00000013552	Scd1	0.996834
NONRATT022191.2	ENSRNOT00000018447	ENSRNOG00000013552	Scd1	0.996834
NONRATT028587.2	ENSRNOT00000018447	ENSRNOG00000013552	Scd1	0.996834
NONRATT029618.2	ENSRNOT00000018447	ENSRNOG00000013552	Scd1	0.996834
NONRATT031263.2	ENSRNOT00000018447	ENSRNOG00000013552	Scd1	0.996834
NONRATT031281.2	ENSRNOT00000018447	ENSRNOG00000013552	Scd1	0.996834
NONRATT012710.2	ENSRNOT00000013005	ENSRNOG00000009660	Enpp6	0.996837
NONRATT005621.2	ENSRNOT00000087403	ENSRNOG00000058904	Tex13	0.996843
NONRATT028848.2	ENSRNOT00000085265	ENSRNOG00000052080	Camk2b	0.99686
NONRATT001131.2	ENSRNOT00000077275	ENSRNOG00000059579	Gpt2	0.996863
NONRATT024188.2	ENSRNOT00000004908	ENSRNOG00000003681	Lct	0.996863
NONRATT023125.2	ENSRNOT00000085265	ENSRNOG00000052080	Camk2b	0.99687
NONRATT008239.2	ENSRNOT00000072483	ENSRNOG00000001960	Sult1d1	0.996888
NONRATT024697.2	ENSRNOT00000072483	ENSRNOG00000001960	Sult1d1	0.996897
NONRATT022029.2	ENSRNOT00000004900	ENSRNOG00000003580	Ucp1	0.996907
NONRATT002972.2	ENSRNOT00000045156	ENSRNOG00000033803	Rpl37	0.996923
NONRATT028730.2	ENSRNOT00000019963	ENSRNOG00000014790	Cryga	0.996923
NONRATT021163.2	ENSRNOT00000055436	ENSRNOG00000036912	AABR07062599.1	0.996927
NONRATT020829.2	ENSRNOT00000078348	ENSRNOG00000059579	Gpt2	0.996942
ENSRNOT00000079713	ENSRNOT00000008613	ENSRNOG00000006367	Slc5a8	0.996967
NONRATT027876.2	ENSRNOT00000040731	ENSRNOG00000030889	Cldn22	0.99698
NONRATT010697.2	ENSRNOT00000017633	ENSRNOG00000012972	Alox5	0.996983
NONRATT023367.2	ENSRNOT00000089616	ENSRNOG00000020970	Rundc3a	0.996988
NONRATT018129.2	ENSRNOT00000040731	ENSRNOG00000030889	Cldn22	0.996996
NONRATT016307.2	ENSRNOT00000004900	ENSRNOG00000003580	Ucp1	0.996999
NONRATT007552.2	ENSRNOT00000019080	ENSRNOG00000014008	Mfsd2a	0.997009
NONRATT024020.2	ENSRNOT00000010831	ENSRNOG00000008074	Cyp11a1	0.997015
MSTRG.628.2	ENSRNOT00000072483	ENSRNOG00000001960	Sult1d1	0.997018
NONRATT010212.2	ENSRNOT00000089332	ENSRNOG00000042860	Pappa2	0.997018
NONRATT023334.2	ENSRNOT00000087403	ENSRNOG00000058904	Tex13	0.997031
NONRATT025686.2	ENSRNOT00000086293	ENSRNOG00000047706	RT1-CE16	0.997043
NONRATT023125.2	ENSRNOT00000029487	ENSRNOG00000020578	Ceacam1	0.997047
NONRATT003293.2	ENSRNOT00000087403	ENSRNOG00000058904	Tex13	0.997047
NONRATT003829.2	ENSRNOT00000087403	ENSRNOG00000058904	Tex13	0.99705
MSTRG.5414.4	ENSRNOT00000013423	ENSRNOG00000009875	Akr1b7	0.997069
NONRATT020863.2	ENSRNOT00000012196	ENSRNOG00000009172	Cpvl	0.997082
MSTRG.11448.4	ENSRNOT00000011945	ENSRNOG00000008816	Gpnmb	0.997094
NONRATT010673.2	ENSRNOT00000089332	ENSRNOG00000042860	Pappa2	0.997096
NONRATT029307.2	ENSRNOT00000033700	ENSRNOG00000023603	Amer3	0.9971
NONRATT025575.2	ENSRNOT00000046010	ENSRNOG00000033152	LOC100360679	0.997106
NONRATT028680.2	ENSRNOT00000085880	ENSRNOG00000018929	Kif20b	0.99711
MSTRG.5414.4	ENSRNOT00000089332	ENSRNOG00000042860	Pappa2	0.997111
MSTRG.460.5	ENSRNOT00000072983	ENSRNOG00000046343	AABR07067896.1	0.997115
NONRATT022029.2	ENSRNOT00000081951	ENSRNOG00000008310	Mpo	0.997117
NONRATT022029.2	ENSRNOT00000065759	ENSRNOG00000015086	Plin1	0.997117
NONRATT022029.2	ENSRNOT00000091197	ENSRNOG00000001001	Retn	0.997117
NONRATT022029.2	ENSRNOT00000038311	ENSRNOG00000009610	Tchhl1	0.997117
NONRATT010673.2	ENSRNOT00000019963	ENSRNOG00000014790	Cryga	0.997119
NONRATT016850.2	ENSRNOT00000054764	ENSRNOG00000036608	Mlana	0.997127
NONRATT022456.2	ENSRNOT00000045156	ENSRNOG00000033803	Rpl37	0.997139
NONRATT024188.2	ENSRNOT00000081951	ENSRNOG00000008310	Mpo	0.99714
NONRATT024188.2	ENSRNOT00000065759	ENSRNOG00000015086	Plin1	0.99714
NONRATT024188.2	ENSRNOT00000091197	ENSRNOG00000001001	Retn	0.99714
NONRATT024188.2	ENSRNOT00000038311	ENSRNOG00000009610	Tchhl1	0.99714
NONRATT003860.2	ENSRNOT00000091048	ENSRNOG00000049056	Ak1	0.997141
NONRATT010212.2	ENSRNOT00000019963	ENSRNOG00000014790	Cryga	0.997149
MSTRG.2420.1	ENSRNOT00000005331	ENSRNOG00000003984	Apln	0.997151
NONRATT016953.2	ENSRNOT00000025770	ENSRNOG00000019050	Ifit1	0.997155
NONRATT003329.2	ENSRNOT00000081951	ENSRNOG00000008310	Mpo	0.997163
NONRATT003329.2	ENSRNOT00000065759	ENSRNOG00000015086	Plin1	0.997163
NONRATT003329.2	ENSRNOT00000091197	ENSRNOG00000001001	Retn	0.997163
NONRATT003329.2	ENSRNOT00000038311	ENSRNOG00000009610	Tchhl1	0.997163
NONRATT022456.2	ENSRNOT00000021901	ENSRNOG00000016295	Lyzl1	0.99717
NONRATT014517.2	ENSRNOT00000025300	ENSRNOG00000023172	Dnajb3	0.997171
NONRATT005842.2	ENSRNOT00000036656	ENSRNOG00000022863	Lingo4	0.997177
NONRATT002972.2	ENSRNOT00000036656	ENSRNOG00000022863	Lingo4	0.997178
NONRATT010212.2	ENSRNOT00000013423	ENSRNOG00000009875	Akr1b7	0.997201
NONRATT026416.2	ENSRNOT00000066821	ENSRNOG00000021160	Hormad1	0.997206
NONRATT000035.2	ENSRNOT00000068690	ENSRNOG00000032805	Cyp2f4	0.997211
NONRATT012705.2	ENSRNOT00000011945	ENSRNOG00000008816	Gpnmb	0.997218
NONRATT024018.2	ENSRNOT00000072983	ENSRNOG00000046343	AABR07067896.1	0.997227
NONRATT022029.2	ENSRNOT00000072100	ENSRNOG00000046239	LOC100909612	0.997238
NONRATT017117.2	ENSRNOT00000050279	ENSRNOG00000031521	Cldn24	0.997251
NONRATT024188.2	ENSRNOT00000004900	ENSRNOG00000003580	Ucp1	0.99727
NONRATT002972.2	ENSRNOT00000021901	ENSRNOG00000016295	Lyzl1	0.997277
NONRATT013518.2	ENSRNOT00000087403	ENSRNOG00000058904	Tex13	0.997299
NONRATT011260.2	ENSRNOT00000036948	ENSRNOG00000022255	Tmprss11e	0.997314
NONRATT003829.2	ENSRNOT00000072983	ENSRNOG00000046343	AABR07067896.1	0.997347
NONRATT012845.2	ENSRNOT00000025770	ENSRNOG00000019050	Ifit1	0.997353
NONRATT010594.2	ENSRNOT00000080525	ENSRNOG00000058568	Dhrs9	0.997369
NONRATT003329.2	ENSRNOT00000004900	ENSRNOG00000003580	Ucp1	0.997373
NONRATT024188.2	ENSRNOT00000018447	ENSRNOG00000013552	Scd1	0.997381
NONRATT012705.2	ENSRNOT00000012310	ENSRNOG00000032626	Mmp3	0.997381
MSTRG.6245.1	ENSRNOT00000068690	ENSRNOG00000032805	Cyp2f4	0.997382
NONRATT028730.2	ENSRNOT00000072460	ENSRNOG00000049961	AABR07037923.2	0.9974
NONRATT017226.2	ENSRNOT00000008613	ENSRNOG00000006367	Slc5a8	0.997412
NONRATT025711.2	ENSRNOT00000080525	ENSRNOG00000058568	Dhrs9	0.997414
NONRATT030662.2	ENSRNOT00000080525	ENSRNOG00000058568	Dhrs9	0.997426
NONRATT030693.2	ENSRNOT00000087403	ENSRNOG00000058904	Tex13	0.997426
NONRATT017137.2	ENSRNOT00000072983	ENSRNOG00000046343	AABR07067896.1	0.997433
ENSRNOT00000079713	ENSRNOT00000047685	ENSRNOG00000014751	Ret	0.997438
NONRATT026398.2	ENSRNOT00000019963	ENSRNOG00000014790	Cryga	0.997441
NONRATT015869.2	ENSRNOT00000028487	ENSRNOG00000020970	Rundc3a	0.997469
ENSRNOT00000082061	ENSRNOT00000028487	ENSRNOG00000020970	Rundc3a	0.997471
NONRATT010673.2	ENSRNOT00000021320	ENSRNOG00000015921	Esco2	0.99748
NONRATT010673.2	ENSRNOT00000083849	ENSRNOG00000053795	SNORD45	0.99748
NONRATT000004.2	ENSRNOT00000047139	ENSRNOG00000029726	Gstm1	0.997481
NONRATT002861.2	ENSRNOT00000082186	ENSRNOG00000060949	Anxa8	0.997486
ENSRNOT00000090050	ENSRNOT00000072983	ENSRNOG00000046343	AABR07067896.1	0.997488
NONRATT001948.2	ENSRNOT00000072983	ENSRNOG00000046343	AABR07067896.1	0.997488
NONRATT002900.2	ENSRNOT00000072983	ENSRNOG00000046343	AABR07067896.1	0.997488
NONRATT003529.2	ENSRNOT00000072983	ENSRNOG00000046343	AABR07067896.1	0.997488
NONRATT003607.2	ENSRNOT00000072983	ENSRNOG00000046343	AABR07067896.1	0.997488
NONRATT021201.2	ENSRNOT00000072983	ENSRNOG00000046343	AABR07067896.1	0.997488
NONRATT021694.2	ENSRNOT00000072983	ENSRNOG00000046343	AABR07067896.1	0.997488
NONRATT030878.2	ENSRNOT00000072983	ENSRNOG00000046343	AABR07067896.1	0.997488
NONRATT030984.2	ENSRNOT00000072983	ENSRNOG00000046343	AABR07067896.1	0.997488
MSTRG.10244.2	ENSRNOT00000072983	ENSRNOG00000046343	AABR07067896.1	0.997488
MSTRG.11449.2	ENSRNOT00000072983	ENSRNOG00000046343	AABR07067896.1	0.997488
MSTRG.11597.1	ENSRNOT00000072983	ENSRNOG00000046343	AABR07067896.1	0.997488
MSTRG.11664.1	ENSRNOT00000072983	ENSRNOG00000046343	AABR07067896.1	0.997488
MSTRG.6537.3	ENSRNOT00000072983	ENSRNOG00000046343	AABR07067896.1	0.997488
NONRATT015869.2	ENSRNOT00000028082	ENSRNOG00000020686	Dkkl1	0.997489
ENSRNOT00000077676	ENSRNOT00000091175	ENSRNOG00000053037	AABR07024139.1	0.997495
ENSRNOT00000082061	ENSRNOT00000028082	ENSRNOG00000020686	Dkkl1	0.997495
NONRATT001282.2	ENSRNOT00000019963	ENSRNOG00000014790	Cryga	0.9975
NONRATT016976.2	ENSRNOT00000065349	ENSRNOG00000000479	Kifc1	0.997505
NONRATT025255.2	ENSRNOT00000078348	ENSRNOG00000059579	Gpt2	0.997512
NONRATT016429.2	ENSRNOT00000084220	ENSRNOG00000053889	Celsr3	0.997515
NONRATT000035.2	ENSRNOT00000001860	ENSRNOG00000001378	Iqcd	0.997549
MSTRG.2420.1	ENSRNOT00000000018	ENSRNOG00000000017	Steap1	0.997556
NONRATT001524.2	ENSRNOT00000072983	ENSRNOG00000046343	AABR07067896.1	0.99756
NONRATT016307.2	ENSRNOT00000072100	ENSRNOG00000046239	LOC100909612	0.997563
NONRATT010697.2	ENSRNOT00000076780	ENSRNOG00000011160	Sv2b	0.997574
MSTRG.460.3	ENSRNOT00000087403	ENSRNOG00000058904	Tex13	0.997576
ENSRNOT00000080938	ENSRNOT00000078348	ENSRNOG00000059579	Gpt2	0.997621
NONRATT003329.2	ENSRNOT00000072100	ENSRNOG00000046239	LOC100909612	0.997637
NONRATT006607.2	ENSRNOT00000072460	ENSRNOG00000049961	AABR07037923.2	0.997652
MSTRG.15013.1	ENSRNOT00000078348	ENSRNOG00000059579	Gpt2	0.997653
NONRATT010673.2	ENSRNOT00000013423	ENSRNOG00000009875	Akr1b7	0.997657
NONRATT002642.2	ENSRNOT00000072100	ENSRNOG00000046239	LOC100909612	0.997669
NONRATT015126.2	ENSRNOT00000012844	ENSRNOG00000009691	Lrrn2	0.997711
MSTRG.22618.1	ENSRNOT00000072983	ENSRNOG00000046343	AABR07067896.1	0.997717
NONRATT012705.2	ENSRNOT00000076904	ENSRNOG00000046790	Irs4	0.997717
NONRATT003540.2	ENSRNOT00000076904	ENSRNOG00000046790	Irs4	0.997726
NONRATT022043.2	ENSRNOT00000027493	ENSRNOG00000020272	5330417C22Rik	0.997734
NONRATT009963.2	ENSRNOT00000068148	ENSRNOG00000002385	Prg4	0.997736
NONRATT031141.2	ENSRNOT00000019080	ENSRNOG00000014008	Mfsd2a	0.997737
MSTRG.450.4	ENSRNOT00000072983	ENSRNOG00000046343	AABR07067896.1	0.997744
NONRATT012710.2	ENSRNOT00000031734	ENSRNOG00000016737	Tcerg1l	0.997748
NONRATT003540.2	ENSRNOT00000068690	ENSRNOG00000032805	Cyp2f4	0.997749
NONRATT001520.2	ENSRNOT00000087403	ENSRNOG00000058904	Tex13	0.997749
NONRATT010790.2	ENSRNOT00000025770	ENSRNOG00000019050	Ifit1	0.99775
NONRATT001520.2	ENSRNOT00000072460	ENSRNOG00000049961	AABR07037923.2	0.997773
MSTRG.11448.4	ENSRNOT00000028487	ENSRNOG00000020970	Rundc3a	0.997774
NONRATT003389.2	ENSRNOT00000072100	ENSRNOG00000046239	LOC100909612	0.997789
NONRATT026138.2	ENSRNOT00000072460	ENSRNOG00000049961	AABR07037923.2	0.997797
NONRATT013349.2	ENSRNOT00000044638	ENSRNOG00000005307	Slc4a10	0.997804
NONRATT006607.2	ENSRNOT00000072983	ENSRNOG00000046343	AABR07067896.1	0.997811
NONRATT015771.2	ENSRNOT00000015716	ENSRNOG00000011427	Hr	0.997823
NONRATT023334.2	ENSRNOT00000072983	ENSRNOG00000046343	AABR07067896.1	0.997824
NONRATT006101.2	ENSRNOT00000025770	ENSRNOG00000019050	Ifit1	0.997864
NONRATT001282.2	ENSRNOT00000087403	ENSRNOG00000058904	Tex13	0.997867
NONRATT003389.2	ENSRNOT00000004900	ENSRNOG00000003580	Ucp1	0.99787
NONRATT013349.2	ENSRNOT00000025770	ENSRNOG00000019050	Ifit1	0.997871
NONRATT005621.2	ENSRNOT00000072983	ENSRNOG00000046343	AABR07067896.1	0.997875
NONRATT012710.2	ENSRNOT00000065349	ENSRNOG00000000479	Kifc1	0.997879
NONRATT028273.2	ENSRNOT00000021390	ENSRNOG00000015945	Cd3g	0.997885
NONRATT020911.2	ENSRNOT00000018447	ENSRNOG00000013552	Scd1	0.997894
NONRATT001282.2	ENSRNOT00000021320	ENSRNOG00000015921	Esco2	0.997904
NONRATT001282.2	ENSRNOT00000083849	ENSRNOG00000053795	SNORD45	0.997904
MSTRG.460.3	ENSRNOT00000019963	ENSRNOG00000014790	Cryga	0.99791
NONRATT020090.2	ENSRNOT00000087403	ENSRNOG00000058904	Tex13	0.997912
NONRATT028730.2	ENSRNOT00000013423	ENSRNOG00000009875	Akr1b7	0.997958
NONRATT018129.2	ENSRNOT00000027022	ENSRNOG00000019920	Doc2a	0.997965
NONRATT003389.2	ENSRNOT00000081951	ENSRNOG00000008310	Mpo	0.997975
NONRATT003389.2	ENSRNOT00000065759	ENSRNOG00000015086	Plin1	0.997975
NONRATT003389.2	ENSRNOT00000091197	ENSRNOG00000001001	Retn	0.997975
NONRATT003389.2	ENSRNOT00000038311	ENSRNOG00000009610	Tchhl1	0.997975
NONRATT026398.2	ENSRNOT00000021320	ENSRNOG00000015921	Esco2	0.998004
NONRATT026398.2	ENSRNOT00000083849	ENSRNOG00000053795	SNORD45	0.998004
NONRATT022927.2	ENSRNOT00000003691	ENSRNOG00000002643	Ugdh	0.998032
NONRATT012180.2	ENSRNOT00000085265	ENSRNOG00000052080	Camk2b	0.998038
NONRATT023983.2	ENSRNOT00000011945	ENSRNOG00000008816	Gpnmb	0.998049
NONRATT025255.2	ENSRNOT00000040731	ENSRNOG00000030889	Cldn22	0.998056
NONRATT012705.2	ENSRNOT00000028082	ENSRNOG00000020686	Dkkl1	0.998079
NONRATT022456.2	ENSRNOT00000036656	ENSRNOG00000022863	Lingo4	0.998086
NONRATT016429.2	ENSRNOT00000076904	ENSRNOG00000046790	Irs4	0.998088
NONRATT009960.2	ENSRNOT00000058838	ENSRNOG00000038572	Ncapg	0.998091
NONRATT013328.2	ENSRNOT00000018447	ENSRNOG00000013552	Scd1	0.998101
NONRATT012705.2	ENSRNOT00000028487	ENSRNOG00000020970	Rundc3a	0.998125
NONRATT025797.2	ENSRNOT00000091317	ENSRNOG00000022802	Tmem184b	0.998153
NONRATT018807.2	ENSRNOT00000055436	ENSRNOG00000036912	AABR07062599.1	0.998155
NONRATT010790.2	ENSRNOT00000044638	ENSRNOG00000005307	Slc4a10	0.998168
NONRATT017226.2	ENSRNOT00000080525	ENSRNOG00000058568	Dhrs9	0.998176
NONRATT001282.2	ENSRNOT00000089332	ENSRNOG00000042860	Pappa2	0.998178
NONRATT002642.2	ENSRNOT00000004900	ENSRNOG00000003580	Ucp1	0.99819
NONRATT005621.2	ENSRNOT00000072460	ENSRNOG00000049961	AABR07037923.2	0.9982
NONRATT005842.2	ENSRNOT00000001860	ENSRNOG00000001378	Iqcd	0.9982
NONRATT027425.2	ENSRNOT00000077275	ENSRNOG00000059579	Gpt2	0.9982
NONRATT026525.2	ENSRNOT00000017633	ENSRNOG00000012972	Alox5	0.99825
NONRATT023367.2	ENSRNOT00000068690	ENSRNOG00000032805	Cyp2f4	0.998266
NONRATT004936.2	ENSRNOT00000080525	ENSRNOG00000058568	Dhrs9	0.998269
NONRATT009662.2	ENSRNOT00000026457	ENSRNOG00000019518	Pde4c	0.998271
NONRATT002185.2	ENSRNOT00000072983	ENSRNOG00000046343	AABR07067896.1	0.998274
NONRATT025575.2	ENSRNOT00000081484	ENSRNOG00000011351	Mat1a	0.998275
NONRATT001524.2	ENSRNOT00000013423	ENSRNOG00000009875	Akr1b7	0.998283
NONRATT000606.2	ENSRNOT00000025770	ENSRNOG00000019050	Ifit1	0.998296
NONRATT001524.2	ENSRNOT00000019963	ENSRNOG00000014790	Cryga	0.9983
NONRATT002642.2	ENSRNOT00000081951	ENSRNOG00000008310	Mpo	0.998301
NONRATT002642.2	ENSRNOT00000065759	ENSRNOG00000015086	Plin1	0.998301
NONRATT002642.2	ENSRNOT00000091197	ENSRNOG00000001001	Retn	0.998301
NONRATT002642.2	ENSRNOT00000038311	ENSRNOG00000009610	Tchhl1	0.998301
NONRATT026138.2	ENSRNOT00000019963	ENSRNOG00000014790	Cryga	0.998303
MSTRG.460.3	ENSRNOT00000021320	ENSRNOG00000015921	Esco2	0.998306
MSTRG.460.3	ENSRNOT00000083849	ENSRNOG00000053795	SNORD45	0.998306
NONRATT027338.2	ENSRNOT00000047043	ENSRNOG00000040101	RGD1563581	0.998327
NONRATT010164.2	ENSRNOT00000076780	ENSRNOG00000011160	Sv2b	0.998328
NONRATT022927.2	ENSRNOT00000077275	ENSRNOG00000059579	Gpt2	0.998329
NONRATT013349.2	ENSRNOT00000082533	ENSRNOG00000053406	Gramd1c	0.998332
NONRATT015869.2	ENSRNOT00000076904	ENSRNOG00000046790	Irs4	0.998337
NONRATT003316.2	ENSRNOT00000072502	ENSRNOG00000024923	Nnat	0.99834
ENSRNOT00000082061	ENSRNOT00000076904	ENSRNOG00000046790	Irs4	0.998343
NONRATT026398.2	ENSRNOT00000087403	ENSRNOG00000058904	Tex13	0.998365
NONRATT013518.2	ENSRNOT00000072983	ENSRNOG00000046343	AABR07067896.1	0.99839
NONRATT026138.2	ENSRNOT00000087403	ENSRNOG00000058904	Tex13	0.998393
NONRATT001524.2	ENSRNOT00000089332	ENSRNOG00000042860	Pappa2	0.998398
MSTRG.460.3	ENSRNOT00000013423	ENSRNOG00000009875	Akr1b7	0.998405
ENSRNOT00000082061	ENSRNOT00000036656	ENSRNOG00000022863	Lingo4	0.998407
NONRATT015869.2	ENSRNOT00000036656	ENSRNOG00000022863	Lingo4	0.998412
NONRATT015639.2	ENSRNOT00000025770	ENSRNOG00000019050	Ifit1	0.998417
NONRATT023367.2	ENSRNOT00000028487	ENSRNOG00000020970	Rundc3a	0.998431
MSTRG.11575.7	ENSRNOT00000085265	ENSRNOG00000052080	Camk2b	0.998441
MSTRG.2442.2	ENSRNOT00000085265	ENSRNOG00000052080	Camk2b	0.998441
MSTRG.8858.2	ENSRNOT00000085265	ENSRNOG00000052080	Camk2b	0.998441
NONRATT001297.2	ENSRNOT00000085265	ENSRNOG00000052080	Camk2b	0.998441
NONRATT005127.2	ENSRNOT00000085265	ENSRNOG00000052080	Camk2b	0.998441
NONRATT005145.2	ENSRNOT00000085265	ENSRNOG00000052080	Camk2b	0.998441
NONRATT009496.2	ENSRNOT00000085265	ENSRNOG00000052080	Camk2b	0.998441
NONRATT015446.2	ENSRNOT00000085265	ENSRNOG00000052080	Camk2b	0.998441
NONRATT019196.2	ENSRNOT00000085265	ENSRNOG00000052080	Camk2b	0.998441
NONRATT019486.2	ENSRNOT00000085265	ENSRNOG00000052080	Camk2b	0.998441
NONRATT019897.2	ENSRNOT00000085265	ENSRNOG00000052080	Camk2b	0.998441
NONRATT020509.2	ENSRNOT00000085265	ENSRNOG00000052080	Camk2b	0.998441
NONRATT021402.2	ENSRNOT00000085265	ENSRNOG00000052080	Camk2b	0.998441
NONRATT021997.2	ENSRNOT00000085265	ENSRNOG00000052080	Camk2b	0.998441
NONRATT022191.2	ENSRNOT00000085265	ENSRNOG00000052080	Camk2b	0.998441
NONRATT028587.2	ENSRNOT00000085265	ENSRNOG00000052080	Camk2b	0.998441
NONRATT029618.2	ENSRNOT00000085265	ENSRNOG00000052080	Camk2b	0.998441
NONRATT031263.2	ENSRNOT00000085265	ENSRNOG00000052080	Camk2b	0.998441
NONRATT031281.2	ENSRNOT00000085265	ENSRNOG00000052080	Camk2b	0.998441
NONRATT001131.2	ENSRNOT00000019080	ENSRNOG00000014008	Mfsd2a	0.998442
NONRATT020911.2	ENSRNOT00000072100	ENSRNOG00000046239	LOC100909612	0.998453
NONRATT016429.2	ENSRNOT00000028082	ENSRNOG00000020686	Dkkl1	0.998455
NONRATT002185.2	ENSRNOT00000013423	ENSRNOG00000009875	Akr1b7	0.99847
NONRATT013328.2	ENSRNOT00000085265	ENSRNOG00000052080	Camk2b	0.99848
NONRATT024697.2	ENSRNOT00000044520	ENSRNOG00000059770	RT1-A3	0.998486
NONRATT013518.2	ENSRNOT00000019963	ENSRNOG00000014790	Cryga	0.998508
NONRATT028716.2	ENSRNOT00000018447	ENSRNOG00000013552	Scd1	0.998516
NONRATT026398.2	ENSRNOT00000013423	ENSRNOG00000009875	Akr1b7	0.998525
NONRATT020911.2	ENSRNOT00000081951	ENSRNOG00000008310	Mpo	0.998543
NONRATT020911.2	ENSRNOT00000065759	ENSRNOG00000015086	Plin1	0.998543
NONRATT020911.2	ENSRNOT00000091197	ENSRNOG00000001001	Retn	0.998543
NONRATT020911.2	ENSRNOT00000038311	ENSRNOG00000009610	Tchhl1	0.998543
MSTRG.5414.4	ENSRNOT00000027681	ENSRNOG00000020424	Ppapdc1a	0.998552
NONRATT026398.2	ENSRNOT00000089332	ENSRNOG00000042860	Pappa2	0.998582
NONRATT001683.2	ENSRNOT00000025770	ENSRNOG00000019050	Ifit1	0.998587
NONRATT030901.2	ENSRNOT00000004908	ENSRNOG00000003681	Lct	0.998613
NONRATT020911.2	ENSRNOT00000004900	ENSRNOG00000003580	Ucp1	0.998613
NONRATT009960.2	ENSRNOT00000063995	ENSRNOG00000002471	Polq	0.998627
NONRATT010468.2	ENSRNOT00000025770	ENSRNOG00000019050	Ifit1	0.998631
NONRATT023682.2	ENSRNOT00000032664	ENSRNOG00000023508	Mfsd2b	0.998634
NONRATT016953.2	ENSRNOT00000044638	ENSRNOG00000005307	Slc4a10	0.998644
NONRATT005842.2	ENSRNOT00000045156	ENSRNOG00000033803	Rpl37	0.998652
NONRATT013518.2	ENSRNOT00000013423	ENSRNOG00000009875	Akr1b7	0.998655
NONRATT003293.2	ENSRNOT00000019963	ENSRNOG00000014790	Cryga	0.998658
NONRATT016334.2	ENSRNOT00000047043	ENSRNOG00000040101	RGD1563581	0.998676
MSTRG.5414.4	ENSRNOT00000087403	ENSRNOG00000058904	Tex13	0.998686
NONRATT001524.2	ENSRNOT00000021320	ENSRNOG00000015921	Esco2	0.998709
NONRATT001524.2	ENSRNOT00000083849	ENSRNOG00000053795	SNORD45	0.998709
NONRATT002185.2	ENSRNOT00000089332	ENSRNOG00000042860	Pappa2	0.998713
NONRATT004936.2	ENSRNOT00000008613	ENSRNOG00000006367	Slc5a8	0.998726
NONRATT023125.2	ENSRNOT00000004900	ENSRNOG00000003580	Ucp1	0.998734
NONRATT017226.2	ENSRNOT00000047685	ENSRNOG00000014751	Ret	0.998737
NONRATT016794.2	ENSRNOT00000079494	ENSRNOG00000050210	RT1-CE10	0.998744
NONRATT005621.2	ENSRNOT00000013423	ENSRNOG00000009875	Akr1b7	0.998745
NONRATT018070.2	ENSRNOT00000027933	ENSRNOG00000020578	Ceacam1	0.998751
NONRATT002185.2	ENSRNOT00000019963	ENSRNOG00000014790	Cryga	0.998751
NONRATT024697.2	ENSRNOT00000010990	ENSRNOG00000025898	LOC690142	0.998758
NONRATT001282.2	ENSRNOT00000013423	ENSRNOG00000009875	Akr1b7	0.998767
MSTRG.2420.1	ENSRNOT00000091175	ENSRNOG00000053037	AABR07024139.1	0.998774
NONRATT018222.2	ENSRNOT00000085265	ENSRNOG00000052080	Camk2b	0.998776
MSTRG.17489.3	ENSRNOT00000025770	ENSRNOG00000019050	Ifit1	0.998797
MSTRG.17489.4	ENSRNOT00000025770	ENSRNOG00000019050	Ifit1	0.998797
MSTRG.17489.5	ENSRNOT00000025770	ENSRNOG00000019050	Ifit1	0.998797
MSTRG.22910.3	ENSRNOT00000025770	ENSRNOG00000019050	Ifit1	0.998797
MSTRG.5414.3	ENSRNOT00000025770	ENSRNOG00000019050	Ifit1	0.998797
NONRATT002231.2	ENSRNOT00000025770	ENSRNOG00000019050	Ifit1	0.998797
NONRATT005431.2	ENSRNOT00000025770	ENSRNOG00000019050	Ifit1	0.998797
NONRATT007885.2	ENSRNOT00000025770	ENSRNOG00000019050	Ifit1	0.998797
NONRATT012479.2	ENSRNOT00000025770	ENSRNOG00000019050	Ifit1	0.998797
NONRATT014240.2	ENSRNOT00000025770	ENSRNOG00000019050	Ifit1	0.998797
NONRATT015323.2	ENSRNOT00000025770	ENSRNOG00000019050	Ifit1	0.998797
NONRATT021350.2	ENSRNOT00000025770	ENSRNOG00000019050	Ifit1	0.998797
NONRATT023402.2	ENSRNOT00000025770	ENSRNOG00000019050	Ifit1	0.998797
NONRATT025511.2	ENSRNOT00000025770	ENSRNOG00000019050	Ifit1	0.998797
NONRATT025512.2	ENSRNOT00000025770	ENSRNOG00000019050	Ifit1	0.998797
MSTRG.11448.4	ENSRNOT00000028082	ENSRNOG00000020686	Dkkl1	0.998817
NONRATT013518.2	ENSRNOT00000072460	ENSRNOG00000049961	AABR07037923.2	0.998822
MSTRG.14660.1	ENSRNOT00000040731	ENSRNOG00000030889	Cldn22	0.998824
NONRATT009963.2	ENSRNOT00000054764	ENSRNOG00000036608	Mlana	0.998826
NONRATT008422.2	ENSRNOT00000050279	ENSRNOG00000031521	Cldn24	0.99883
NONRATT022029.2	ENSRNOT00000029487	ENSRNOG00000020578	Ceacam1	0.998833
NONRATT018129.2	ENSRNOT00000005331	ENSRNOG00000003984	Apln	0.998846
NONRATT001520.2	ENSRNOT00000019963	ENSRNOG00000014790	Cryga	0.998857
NONRATT023125.2	ENSRNOT00000072100	ENSRNOG00000046239	LOC100909612	0.998858
NONRATT005621.2	ENSRNOT00000019963	ENSRNOG00000014790	Cryga	0.998865
NONRATT027142.2	ENSRNOT00000051751	ENSRNOG00000033386	Itih1	0.998868
NONRATT012705.2	ENSRNOT00000068690	ENSRNOG00000032805	Cyp2f4	0.998869
MSTRG.460.3	ENSRNOT00000089332	ENSRNOG00000042860	Pappa2	0.998872
NONRATT001683.2	ENSRNOT00000044638	ENSRNOG00000005307	Slc4a10	0.998872
NONRATT023125.2	ENSRNOT00000081951	ENSRNOG00000008310	Mpo	0.998872
NONRATT023125.2	ENSRNOT00000065759	ENSRNOG00000015086	Plin1	0.998872
NONRATT023125.2	ENSRNOT00000091197	ENSRNOG00000001001	Retn	0.998872
NONRATT023125.2	ENSRNOT00000038311	ENSRNOG00000009610	Tchhl1	0.998872
MSTRG.9923.2	ENSRNOT00000025770	ENSRNOG00000019050	Ifit1	0.99888
NONRATT017960.2	ENSRNOT00000015716	ENSRNOG00000011427	Hr	0.998887
NONRATT025575.2	ENSRNOT00000082156	ENSRNOG00000025608	Lrat	0.998891
NONRATT003293.2	ENSRNOT00000089332	ENSRNOG00000042860	Pappa2	0.998899
NONRATT024018.2	ENSRNOT00000072460	ENSRNOG00000049961	AABR07037923.2	0.998905
NONRATT014467.2	ENSRNOT00000038212	ENSRNOG00000025764	Mt1	0.99894
NONRATT006101.2	ENSRNOT00000082533	ENSRNOG00000053406	Gramd1c	0.998951
NONRATT027425.2	ENSRNOT00000019080	ENSRNOG00000014008	Mfsd2a	0.998955
NONRATT026138.2	ENSRNOT00000021320	ENSRNOG00000015921	Esco2	0.998956
NONRATT026138.2	ENSRNOT00000083849	ENSRNOG00000053795	SNORD45	0.998956
NONRATT022283.2	ENSRNOT00000025770	ENSRNOG00000019050	Ifit1	0.998968
NONRATT006101.2	ENSRNOT00000044638	ENSRNOG00000005307	Slc4a10	0.998977
NONRATT003293.2	ENSRNOT00000072460	ENSRNOG00000049961	AABR07037923.2	0.998978
NONRATT025772.2	ENSRNOT00000015205	ENSRNOG00000010938	Slc7a10	0.998979
NONRATT010673.2	ENSRNOT00000072460	ENSRNOG00000049961	AABR07037923.2	0.998996
NONRATT026138.2	ENSRNOT00000013423	ENSRNOG00000009875	Akr1b7	0.999019
MSTRG.6245.1	ENSRNOT00000036656	ENSRNOG00000022863	Lingo4	0.999041
NONRATT025711.2	ENSRNOT00000008613	ENSRNOG00000006367	Slc5a8	0.999043
NONRATT008391.2	ENSRNOT00000072460	ENSRNOG00000049961	AABR07037923.2	0.999052
NONRATT025222.2	ENSRNOT00000055436	ENSRNOG00000036912	AABR07062599.1	0.999064
NONRATT021426.2	ENSRNOT00000091317	ENSRNOG00000022802	Tmem184b	0.999065
NONRATT003293.2	ENSRNOT00000021320	ENSRNOG00000015921	Esco2	0.999077
NONRATT003293.2	ENSRNOT00000083849	ENSRNOG00000053795	SNORD45	0.999077
NONRATT016953.2	ENSRNOT00000082533	ENSRNOG00000053406	Gramd1c	0.999102
NONRATT002185.2	ENSRNOT00000021320	ENSRNOG00000015921	Esco2	0.99912
NONRATT002185.2	ENSRNOT00000083849	ENSRNOG00000053795	SNORD45	0.99912
NONRATT005639.2	ENSRNOT00000029487	ENSRNOG00000020578	Ceacam1	0.999125
NONRATT002185.2	ENSRNOT00000072460	ENSRNOG00000049961	AABR07037923.2	0.999128
NONRATT013518.2	ENSRNOT00000021320	ENSRNOG00000015921	Esco2	0.999154
NONRATT013518.2	ENSRNOT00000083849	ENSRNOG00000053795	SNORD45	0.999154
MSTRG.450.4	ENSRNOT00000013423	ENSRNOG00000009875	Akr1b7	0.999183
NONRATT001520.2	ENSRNOT00000021320	ENSRNOG00000015921	Esco2	0.9992
NONRATT001520.2	ENSRNOT00000083849	ENSRNOG00000053795	SNORD45	0.9992
NONRATT010790.2	ENSRNOT00000082533	ENSRNOG00000053406	Gramd1c	0.999202
NONRATT022283.2	ENSRNOT00000044638	ENSRNOG00000005307	Slc4a10	0.999218
NONRATT028716.2	ENSRNOT00000072100	ENSRNOG00000046239	LOC100909612	0.999228
NONRATT028716.2	ENSRNOT00000081951	ENSRNOG00000008310	Mpo	0.99923
NONRATT028716.2	ENSRNOT00000065759	ENSRNOG00000015086	Plin1	0.99923
NONRATT028716.2	ENSRNOT00000091197	ENSRNOG00000001001	Retn	0.99923
NONRATT028716.2	ENSRNOT00000038311	ENSRNOG00000009610	Tchhl1	0.99923
NONRATT013328.2	ENSRNOT00000081951	ENSRNOG00000008310	Mpo	0.999235
NONRATT013328.2	ENSRNOT00000065759	ENSRNOG00000015086	Plin1	0.999235
NONRATT013328.2	ENSRNOT00000091197	ENSRNOG00000001001	Retn	0.999235
NONRATT013328.2	ENSRNOT00000038311	ENSRNOG00000009610	Tchhl1	0.999235
NONRATT000606.2	ENSRNOT00000082533	ENSRNOG00000053406	Gramd1c	0.999238
MSTRG.460.5	ENSRNOT00000072460	ENSRNOG00000049961	AABR07037923.2	0.999245
NONRATT008391.2	ENSRNOT00000013423	ENSRNOG00000009875	Akr1b7	0.999246
NONRATT003293.2	ENSRNOT00000013423	ENSRNOG00000009875	Akr1b7	0.999254
NONRATT000606.2	ENSRNOT00000044638	ENSRNOG00000005307	Slc4a10	0.999255
NONRATT030693.2	ENSRNOT00000072460	ENSRNOG00000049961	AABR07037923.2	0.99926
NONRATT008391.2	ENSRNOT00000089332	ENSRNOG00000042860	Pappa2	0.999286
NONRATT005621.2	ENSRNOT00000021320	ENSRNOG00000015921	Esco2	0.999295
NONRATT005621.2	ENSRNOT00000083849	ENSRNOG00000053795	SNORD45	0.999295
MSTRG.11448.4	ENSRNOT00000068690	ENSRNOG00000032805	Cyp2f4	0.999303
NONRATT001520.2	ENSRNOT00000013423	ENSRNOG00000009875	Akr1b7	0.99931
NONRATT013328.2	ENSRNOT00000004900	ENSRNOG00000003580	Ucp1	0.999345
NONRATT026138.2	ENSRNOT00000089332	ENSRNOG00000042860	Pappa2	0.999348
NONRATT013518.2	ENSRNOT00000089332	ENSRNOG00000042860	Pappa2	0.99935
NONRATT028716.2	ENSRNOT00000004900	ENSRNOG00000003580	Ucp1	0.999382
MSTRG.460.5	ENSRNOT00000013423	ENSRNOG00000009875	Akr1b7	0.999385
NONRATT024018.2	ENSRNOT00000013423	ENSRNOG00000009875	Akr1b7	0.999414
MSTRG.11448.4	ENSRNOT00000076904	ENSRNOG00000046790	Irs4	0.999424
NONRATT013328.2	ENSRNOT00000072100	ENSRNOG00000046239	LOC100909612	0.999438
NONRATT003829.2	ENSRNOT00000072460	ENSRNOG00000049961	AABR07037923.2	0.999442
NONRATT020014.2	ENSRNOT00000027681	ENSRNOG00000020424	Ppapdc1a	0.999448
MSTRG.450.4	ENSRNOT00000089332	ENSRNOG00000042860	Pappa2	0.999467
MSTRG.22618.1	ENSRNOT00000072460	ENSRNOG00000049961	AABR07037923.2	0.999467
NONRATT001520.2	ENSRNOT00000089332	ENSRNOG00000042860	Pappa2	0.999471
NONRATT023334.2	ENSRNOT00000019963	ENSRNOG00000014790	Cryga	0.999478
NONRATT015869.2	ENSRNOT00000068690	ENSRNOG00000032805	Cyp2f4	0.999478
ENSRNOT00000082061	ENSRNOT00000068690	ENSRNOG00000032805	Cyp2f4	0.999478
NONRATT008391.2	ENSRNOT00000021320	ENSRNOG00000015921	Esco2	0.999483
NONRATT008391.2	ENSRNOT00000083849	ENSRNOG00000053795	SNORD45	0.999483
NONRATT001683.2	ENSRNOT00000082533	ENSRNOG00000053406	Gramd1c	0.999499
NONRATT005621.2	ENSRNOT00000089332	ENSRNOG00000042860	Pappa2	0.999519
NONRATT018222.2	ENSRNOT00000072100	ENSRNOG00000046239	LOC100909612	0.999523
MSTRG.22618.1	ENSRNOT00000013423	ENSRNOG00000009875	Akr1b7	0.999538
MSTRG.10244.2	ENSRNOT00000072460	ENSRNOG00000049961	AABR07037923.2	0.999546
MSTRG.11449.2	ENSRNOT00000072460	ENSRNOG00000049961	AABR07037923.2	0.999546
MSTRG.11597.1	ENSRNOT00000072460	ENSRNOG00000049961	AABR07037923.2	0.999546
MSTRG.11664.1	ENSRNOT00000072460	ENSRNOG00000049961	AABR07037923.2	0.999546
MSTRG.6537.3	ENSRNOT00000072460	ENSRNOG00000049961	AABR07037923.2	0.999546
ENSRNOT00000090050	ENSRNOT00000072460	ENSRNOG00000049961	AABR07037923.2	0.999546
NONRATT001948.2	ENSRNOT00000072460	ENSRNOG00000049961	AABR07037923.2	0.999546
NONRATT002900.2	ENSRNOT00000072460	ENSRNOG00000049961	AABR07037923.2	0.999546
NONRATT003529.2	ENSRNOT00000072460	ENSRNOG00000049961	AABR07037923.2	0.999546
NONRATT003607.2	ENSRNOT00000072460	ENSRNOG00000049961	AABR07037923.2	0.999546
NONRATT021201.2	ENSRNOT00000072460	ENSRNOG00000049961	AABR07037923.2	0.999546
NONRATT021694.2	ENSRNOT00000072460	ENSRNOG00000049961	AABR07037923.2	0.999546
NONRATT030878.2	ENSRNOT00000072460	ENSRNOG00000049961	AABR07037923.2	0.999546
NONRATT030984.2	ENSRNOT00000072460	ENSRNOG00000049961	AABR07037923.2	0.999546
NONRATT015639.2	ENSRNOT00000044638	ENSRNOG00000005307	Slc4a10	0.999565
NONRATT023334.2	ENSRNOT00000013423	ENSRNOG00000009875	Akr1b7	0.999572
NONRATT020863.2	ENSRNOT00000091317	ENSRNOG00000022802	Tmem184b	0.999615
NONRATT015052.2	ENSRNOT00000038816	ENSRNOG00000033970	Moap1	0.999622
NONRATT012180.2	ENSRNOT00000072100	ENSRNOG00000046239	LOC100909612	0.999652
MSTRG.450.4	ENSRNOT00000072460	ENSRNOG00000049961	AABR07037923.2	0.999658
MSTRG.10244.2	ENSRNOT00000013423	ENSRNOG00000009875	Akr1b7	0.999658
MSTRG.11449.2	ENSRNOT00000013423	ENSRNOG00000009875	Akr1b7	0.999658
MSTRG.11597.1	ENSRNOT00000013423	ENSRNOG00000009875	Akr1b7	0.999658
MSTRG.11664.1	ENSRNOT00000013423	ENSRNOG00000009875	Akr1b7	0.999658
MSTRG.6537.3	ENSRNOT00000013423	ENSRNOG00000009875	Akr1b7	0.999658
ENSRNOT00000090050	ENSRNOT00000013423	ENSRNOG00000009875	Akr1b7	0.999658
NONRATT001948.2	ENSRNOT00000013423	ENSRNOG00000009875	Akr1b7	0.999658
NONRATT002900.2	ENSRNOT00000013423	ENSRNOG00000009875	Akr1b7	0.999658
NONRATT003529.2	ENSRNOT00000013423	ENSRNOG00000009875	Akr1b7	0.999658
NONRATT003607.2	ENSRNOT00000013423	ENSRNOG00000009875	Akr1b7	0.999658
NONRATT021201.2	ENSRNOT00000013423	ENSRNOG00000009875	Akr1b7	0.999658
NONRATT021694.2	ENSRNOT00000013423	ENSRNOG00000009875	Akr1b7	0.999658
NONRATT030878.2	ENSRNOT00000013423	ENSRNOG00000009875	Akr1b7	0.999658
NONRATT030984.2	ENSRNOT00000013423	ENSRNOG00000009875	Akr1b7	0.999658
MSTRG.460.5	ENSRNOT00000089332	ENSRNOG00000042860	Pappa2	0.999658
NONRATT017137.2	ENSRNOT00000013423	ENSRNOG00000009875	Akr1b7	0.999684
NONRATT023334.2	ENSRNOT00000089332	ENSRNOG00000042860	Pappa2	0.999688
NONRATT024018.2	ENSRNOT00000019963	ENSRNOG00000014790	Cryga	0.999701
NONRATT017137.2	ENSRNOT00000019963	ENSRNOG00000014790	Cryga	0.999711
NONRATT003829.2	ENSRNOT00000013423	ENSRNOG00000009875	Akr1b7	0.999729
NONRATT017137.2	ENSRNOT00000072460	ENSRNOG00000049961	AABR07037923.2	0.999734
NONRATT022283.2	ENSRNOT00000082533	ENSRNOG00000053406	Gramd1c	0.999737
NONRATT023334.2	ENSRNOT00000072460	ENSRNOG00000049961	AABR07037923.2	0.999741
NONRATT018222.2	ENSRNOT00000004900	ENSRNOG00000003580	Ucp1	0.999749
NONRATT017137.2	ENSRNOT00000089332	ENSRNOG00000042860	Pappa2	0.999756
NONRATT001524.2	ENSRNOT00000072460	ENSRNOG00000049961	AABR07037923.2	0.999759
MSTRG.17489.3	ENSRNOT00000044638	ENSRNOG00000005307	Slc4a10	0.99977
MSTRG.17489.4	ENSRNOT00000044638	ENSRNOG00000005307	Slc4a10	0.99977
MSTRG.17489.5	ENSRNOT00000044638	ENSRNOG00000005307	Slc4a10	0.99977
MSTRG.22910.3	ENSRNOT00000044638	ENSRNOG00000005307	Slc4a10	0.99977
MSTRG.5414.3	ENSRNOT00000044638	ENSRNOG00000005307	Slc4a10	0.99977
NONRATT002231.2	ENSRNOT00000044638	ENSRNOG00000005307	Slc4a10	0.99977
NONRATT005431.2	ENSRNOT00000044638	ENSRNOG00000005307	Slc4a10	0.99977
NONRATT007885.2	ENSRNOT00000044638	ENSRNOG00000005307	Slc4a10	0.99977
NONRATT012479.2	ENSRNOT00000044638	ENSRNOG00000005307	Slc4a10	0.99977
NONRATT014240.2	ENSRNOT00000044638	ENSRNOG00000005307	Slc4a10	0.99977
NONRATT015323.2	ENSRNOT00000044638	ENSRNOG00000005307	Slc4a10	0.99977
NONRATT021350.2	ENSRNOT00000044638	ENSRNOG00000005307	Slc4a10	0.99977
NONRATT023402.2	ENSRNOT00000044638	ENSRNOG00000005307	Slc4a10	0.99977
NONRATT025511.2	ENSRNOT00000044638	ENSRNOG00000005307	Slc4a10	0.99977
NONRATT025512.2	ENSRNOT00000044638	ENSRNOG00000005307	Slc4a10	0.99977
NONRATT030693.2	ENSRNOT00000019963	ENSRNOG00000014790	Cryga	0.999771
MSTRG.450.4	ENSRNOT00000019963	ENSRNOG00000014790	Cryga	0.999785
NONRATT001297.2	ENSRNOT00000072100	ENSRNOG00000046239	LOC100909612	0.999794
NONRATT005127.2	ENSRNOT00000072100	ENSRNOG00000046239	LOC100909612	0.999794
NONRATT005145.2	ENSRNOT00000072100	ENSRNOG00000046239	LOC100909612	0.999794
NONRATT009496.2	ENSRNOT00000072100	ENSRNOG00000046239	LOC100909612	0.999794
NONRATT015446.2	ENSRNOT00000072100	ENSRNOG00000046239	LOC100909612	0.999794
NONRATT019196.2	ENSRNOT00000072100	ENSRNOG00000046239	LOC100909612	0.999794
NONRATT019486.2	ENSRNOT00000072100	ENSRNOG00000046239	LOC100909612	0.999794
NONRATT019897.2	ENSRNOT00000072100	ENSRNOG00000046239	LOC100909612	0.999794
NONRATT020509.2	ENSRNOT00000072100	ENSRNOG00000046239	LOC100909612	0.999794
NONRATT021402.2	ENSRNOT00000072100	ENSRNOG00000046239	LOC100909612	0.999794
NONRATT021997.2	ENSRNOT00000072100	ENSRNOG00000046239	LOC100909612	0.999794
NONRATT022191.2	ENSRNOT00000072100	ENSRNOG00000046239	LOC100909612	0.999794
NONRATT028587.2	ENSRNOT00000072100	ENSRNOG00000046239	LOC100909612	0.999794
NONRATT029618.2	ENSRNOT00000072100	ENSRNOG00000046239	LOC100909612	0.999794
NONRATT031263.2	ENSRNOT00000072100	ENSRNOG00000046239	LOC100909612	0.999794
NONRATT031281.2	ENSRNOT00000072100	ENSRNOG00000046239	LOC100909612	0.999794
MSTRG.11575.7	ENSRNOT00000072100	ENSRNOG00000046239	LOC100909612	0.999794
MSTRG.2442.2	ENSRNOT00000072100	ENSRNOG00000046239	LOC100909612	0.999794
MSTRG.8858.2	ENSRNOT00000072100	ENSRNOG00000046239	LOC100909612	0.999794
NONRATT018222.2	ENSRNOT00000081951	ENSRNOG00000008310	Mpo	0.999796
NONRATT018222.2	ENSRNOT00000065759	ENSRNOG00000015086	Plin1	0.999796
NONRATT018222.2	ENSRNOT00000091197	ENSRNOG00000001001	Retn	0.999796
NONRATT018222.2	ENSRNOT00000038311	ENSRNOG00000009610	Tchhl1	0.999796
MSTRG.450.4	ENSRNOT00000021320	ENSRNOG00000015921	Esco2	0.9998
MSTRG.450.4	ENSRNOT00000083849	ENSRNOG00000053795	SNORD45	0.9998
NONRATT024018.2	ENSRNOT00000021320	ENSRNOG00000015921	Esco2	0.999814
NONRATT024018.2	ENSRNOT00000083849	ENSRNOG00000053795	SNORD45	0.999814
NONRATT003829.2	ENSRNOT00000019963	ENSRNOG00000014790	Cryga	0.999816
NONRATT023334.2	ENSRNOT00000021320	ENSRNOG00000015921	Esco2	0.999818
NONRATT023334.2	ENSRNOT00000083849	ENSRNOG00000053795	SNORD45	0.999818
NONRATT017117.2	ENSRNOT00000019080	ENSRNOG00000014008	Mfsd2a	0.999819
NONRATT008391.2	ENSRNOT00000019963	ENSRNOG00000014790	Cryga	0.999826
MSTRG.9923.2	ENSRNOT00000044638	ENSRNOG00000005307	Slc4a10	0.999838
NONRATT010468.2	ENSRNOT00000044638	ENSRNOG00000005307	Slc4a10	0.999843
MSTRG.22618.1	ENSRNOT00000019963	ENSRNOG00000014790	Cryga	0.999856
NONRATT004897.2	ENSRNOT00000060327	ENSRNOG00000033215	RT1-Db1	0.999864
MSTRG.460.5	ENSRNOT00000021320	ENSRNOG00000015921	Esco2	0.999866
MSTRG.460.5	ENSRNOT00000083849	ENSRNOG00000053795	SNORD45	0.999866
MSTRG.10244.2	ENSRNOT00000019963	ENSRNOG00000014790	Cryga	0.999874
MSTRG.11449.2	ENSRNOT00000019963	ENSRNOG00000014790	Cryga	0.999874
MSTRG.11597.1	ENSRNOT00000019963	ENSRNOG00000014790	Cryga	0.999874
MSTRG.11664.1	ENSRNOT00000019963	ENSRNOG00000014790	Cryga	0.999874
MSTRG.6537.3	ENSRNOT00000019963	ENSRNOG00000014790	Cryga	0.999874
ENSRNOT00000090050	ENSRNOT00000019963	ENSRNOG00000014790	Cryga	0.999874
NONRATT001948.2	ENSRNOT00000019963	ENSRNOG00000014790	Cryga	0.999874
NONRATT002900.2	ENSRNOT00000019963	ENSRNOG00000014790	Cryga	0.999874
NONRATT003529.2	ENSRNOT00000019963	ENSRNOG00000014790	Cryga	0.999874
NONRATT003607.2	ENSRNOT00000019963	ENSRNOG00000014790	Cryga	0.999874
NONRATT021201.2	ENSRNOT00000019963	ENSRNOG00000014790	Cryga	0.999874
NONRATT021694.2	ENSRNOT00000019963	ENSRNOG00000014790	Cryga	0.999874
NONRATT030878.2	ENSRNOT00000019963	ENSRNOG00000014790	Cryga	0.999874
NONRATT030984.2	ENSRNOT00000019963	ENSRNOG00000014790	Cryga	0.999874
NONRATT021426.2	ENSRNOT00000012196	ENSRNOG00000009172	Cpvl	0.999883
MSTRG.22618.1	ENSRNOT00000089332	ENSRNOG00000042860	Pappa2	0.999889
NONRATT000035.2	ENSRNOT00000036656	ENSRNOG00000022863	Lingo4	0.999896
NONRATT024018.2	ENSRNOT00000089332	ENSRNOG00000042860	Pappa2	0.999897
NONRATT030693.2	ENSRNOT00000021320	ENSRNOG00000015921	Esco2	0.999897
NONRATT030693.2	ENSRNOT00000083849	ENSRNOG00000053795	SNORD45	0.999897
NONRATT028049.2	ENSRNOT00000018447	ENSRNOG00000013552	Scd1	0.999901
NONRATT007552.2	ENSRNOT00000050279	ENSRNOG00000031521	Cldn24	0.999906
NONRATT030693.2	ENSRNOT00000013423	ENSRNOG00000009875	Akr1b7	0.999907
NONRATT017137.2	ENSRNOT00000021320	ENSRNOG00000015921	Esco2	0.999908
NONRATT017137.2	ENSRNOT00000083849	ENSRNOG00000053795	SNORD45	0.999908
NONRATT010468.2	ENSRNOT00000082533	ENSRNOG00000053406	Gramd1c	0.99991
NONRATT003305.2	ENSRNOT00000050279	ENSRNOG00000031521	Cldn24	0.999912
NONRATT002642.2	ENSRNOT00000085265	ENSRNOG00000052080	Camk2b	0.999917
NONRATT012180.2	ENSRNOT00000004900	ENSRNOG00000003580	Ucp1	0.999919
MSTRG.10244.2	ENSRNOT00000089332	ENSRNOG00000042860	Pappa2	0.999919
MSTRG.11449.2	ENSRNOT00000089332	ENSRNOG00000042860	Pappa2	0.999919
MSTRG.11597.1	ENSRNOT00000089332	ENSRNOG00000042860	Pappa2	0.999919
MSTRG.11664.1	ENSRNOT00000089332	ENSRNOG00000042860	Pappa2	0.999919
MSTRG.6537.3	ENSRNOT00000089332	ENSRNOG00000042860	Pappa2	0.999919
ENSRNOT00000090050	ENSRNOT00000089332	ENSRNOG00000042860	Pappa2	0.999919
NONRATT001948.2	ENSRNOT00000089332	ENSRNOG00000042860	Pappa2	0.999919
NONRATT002900.2	ENSRNOT00000089332	ENSRNOG00000042860	Pappa2	0.999919
NONRATT003529.2	ENSRNOT00000089332	ENSRNOG00000042860	Pappa2	0.999919
NONRATT003607.2	ENSRNOT00000089332	ENSRNOG00000042860	Pappa2	0.999919
NONRATT021201.2	ENSRNOT00000089332	ENSRNOG00000042860	Pappa2	0.999919
NONRATT021694.2	ENSRNOT00000089332	ENSRNOG00000042860	Pappa2	0.999919
NONRATT030878.2	ENSRNOT00000089332	ENSRNOG00000042860	Pappa2	0.999919
NONRATT030984.2	ENSRNOT00000089332	ENSRNOG00000042860	Pappa2	0.999919
MSTRG.9923.2	ENSRNOT00000082533	ENSRNOG00000053406	Gramd1c	0.999921
NONRATT030693.2	ENSRNOT00000089332	ENSRNOG00000042860	Pappa2	0.999937
MSTRG.460.5	ENSRNOT00000019963	ENSRNOG00000014790	Cryga	0.999938
NONRATT029495.2	ENSRNOT00000033953	ENSRNOG00000023092	Prss54	0.999942
NONRATT012180.2	ENSRNOT00000081951	ENSRNOG00000008310	Mpo	0.999945
NONRATT012180.2	ENSRNOT00000065759	ENSRNOG00000015086	Plin1	0.999945
NONRATT012180.2	ENSRNOT00000091197	ENSRNOG00000001001	Retn	0.999945
NONRATT012180.2	ENSRNOT00000038311	ENSRNOG00000009610	Tchhl1	0.999945
NONRATT015639.2	ENSRNOT00000082533	ENSRNOG00000053406	Gramd1c	0.999953
NONRATT003829.2	ENSRNOT00000089332	ENSRNOG00000042860	Pappa2	0.999977
NONRATT003829.2	ENSRNOT00000021320	ENSRNOG00000015921	Esco2	0.999983
NONRATT003829.2	ENSRNOT00000083849	ENSRNOG00000053795	SNORD45	0.999983
NONRATT028882.2	ENSRNOT00000037311	ENSRNOG00000024527	Olr1572	0.999984
MSTRG.22618.1	ENSRNOT00000021320	ENSRNOG00000015921	Esco2	0.999986
MSTRG.22618.1	ENSRNOT00000083849	ENSRNOG00000053795	SNORD45	0.999986
NONRATT001297.2	ENSRNOT00000004900	ENSRNOG00000003580	Ucp1	0.999991
NONRATT005127.2	ENSRNOT00000004900	ENSRNOG00000003580	Ucp1	0.999991
NONRATT005145.2	ENSRNOT00000004900	ENSRNOG00000003580	Ucp1	0.999991
NONRATT009496.2	ENSRNOT00000004900	ENSRNOG00000003580	Ucp1	0.999991
NONRATT015446.2	ENSRNOT00000004900	ENSRNOG00000003580	Ucp1	0.999991
NONRATT019196.2	ENSRNOT00000004900	ENSRNOG00000003580	Ucp1	0.999991
NONRATT019486.2	ENSRNOT00000004900	ENSRNOG00000003580	Ucp1	0.999991
NONRATT019897.2	ENSRNOT00000004900	ENSRNOG00000003580	Ucp1	0.999991
NONRATT020509.2	ENSRNOT00000004900	ENSRNOG00000003580	Ucp1	0.999991
NONRATT021402.2	ENSRNOT00000004900	ENSRNOG00000003580	Ucp1	0.999991
NONRATT021997.2	ENSRNOT00000004900	ENSRNOG00000003580	Ucp1	0.999991
NONRATT022191.2	ENSRNOT00000004900	ENSRNOG00000003580	Ucp1	0.999991
NONRATT028587.2	ENSRNOT00000004900	ENSRNOG00000003580	Ucp1	0.999991
NONRATT029618.2	ENSRNOT00000004900	ENSRNOG00000003580	Ucp1	0.999991
NONRATT031263.2	ENSRNOT00000004900	ENSRNOG00000003580	Ucp1	0.999991
NONRATT031281.2	ENSRNOT00000004900	ENSRNOG00000003580	Ucp1	0.999991
MSTRG.11575.7	ENSRNOT00000004900	ENSRNOG00000003580	Ucp1	0.999991
MSTRG.2442.2	ENSRNOT00000004900	ENSRNOG00000003580	Ucp1	0.999991
MSTRG.8858.2	ENSRNOT00000004900	ENSRNOG00000003580	Ucp1	0.999991
NONRATT008192.2	ENSRNOT00000047043	ENSRNOG00000040101	RGD1563581	0.999997
NONRATT014914.2	ENSRNOT00000047043	ENSRNOG00000040101	RGD1563581	0.999997
ENSRNOT00000090050	ENSRNOT00000021320	ENSRNOG00000015921	Esco2	1
ENSRNOT00000090050	ENSRNOT00000083849	ENSRNOG00000053795	SNORD45	1
NONRATT001297.2	ENSRNOT00000081951	ENSRNOG00000008310	Mpo	1
NONRATT001297.2	ENSRNOT00000065759	ENSRNOG00000015086	Plin1	1
NONRATT001297.2	ENSRNOT00000091197	ENSRNOG00000001001	Retn	1
NONRATT001297.2	ENSRNOT00000038311	ENSRNOG00000009610	Tchhl1	1
NONRATT001948.2	ENSRNOT00000021320	ENSRNOG00000015921	Esco2	1
NONRATT001948.2	ENSRNOT00000083849	ENSRNOG00000053795	SNORD45	1
NONRATT002231.2	ENSRNOT00000082533	ENSRNOG00000053406	Gramd1c	1
NONRATT002900.2	ENSRNOT00000021320	ENSRNOG00000015921	Esco2	1
NONRATT002900.2	ENSRNOT00000083849	ENSRNOG00000053795	SNORD45	1
NONRATT003529.2	ENSRNOT00000021320	ENSRNOG00000015921	Esco2	1
NONRATT003529.2	ENSRNOT00000083849	ENSRNOG00000053795	SNORD45	1
NONRATT003607.2	ENSRNOT00000021320	ENSRNOG00000015921	Esco2	1
NONRATT003607.2	ENSRNOT00000083849	ENSRNOG00000053795	SNORD45	1
NONRATT005127.2	ENSRNOT00000081951	ENSRNOG00000008310	Mpo	1
NONRATT005127.2	ENSRNOT00000065759	ENSRNOG00000015086	Plin1	1
NONRATT005127.2	ENSRNOT00000091197	ENSRNOG00000001001	Retn	1
NONRATT005127.2	ENSRNOT00000038311	ENSRNOG00000009610	Tchhl1	1
NONRATT005145.2	ENSRNOT00000081951	ENSRNOG00000008310	Mpo	1
NONRATT005145.2	ENSRNOT00000065759	ENSRNOG00000015086	Plin1	1
NONRATT005145.2	ENSRNOT00000091197	ENSRNOG00000001001	Retn	1
NONRATT005145.2	ENSRNOT00000038311	ENSRNOG00000009610	Tchhl1	1
NONRATT005431.2	ENSRNOT00000082533	ENSRNOG00000053406	Gramd1c	1
NONRATT007885.2	ENSRNOT00000082533	ENSRNOG00000053406	Gramd1c	1
NONRATT009496.2	ENSRNOT00000081951	ENSRNOG00000008310	Mpo	1
NONRATT009496.2	ENSRNOT00000065759	ENSRNOG00000015086	Plin1	1
NONRATT009496.2	ENSRNOT00000091197	ENSRNOG00000001001	Retn	1
NONRATT009496.2	ENSRNOT00000038311	ENSRNOG00000009610	Tchhl1	1
NONRATT012479.2	ENSRNOT00000082533	ENSRNOG00000053406	Gramd1c	1
NONRATT014240.2	ENSRNOT00000082533	ENSRNOG00000053406	Gramd1c	1
NONRATT015323.2	ENSRNOT00000082533	ENSRNOG00000053406	Gramd1c	1
NONRATT015446.2	ENSRNOT00000081951	ENSRNOG00000008310	Mpo	1
NONRATT015446.2	ENSRNOT00000065759	ENSRNOG00000015086	Plin1	1
NONRATT015446.2	ENSRNOT00000091197	ENSRNOG00000001001	Retn	1
NONRATT015446.2	ENSRNOT00000038311	ENSRNOG00000009610	Tchhl1	1
NONRATT019196.2	ENSRNOT00000081951	ENSRNOG00000008310	Mpo	1
NONRATT019196.2	ENSRNOT00000065759	ENSRNOG00000015086	Plin1	1
NONRATT019196.2	ENSRNOT00000091197	ENSRNOG00000001001	Retn	1
NONRATT019196.2	ENSRNOT00000038311	ENSRNOG00000009610	Tchhl1	1
NONRATT019486.2	ENSRNOT00000081951	ENSRNOG00000008310	Mpo	1
NONRATT019486.2	ENSRNOT00000065759	ENSRNOG00000015086	Plin1	1
NONRATT019486.2	ENSRNOT00000091197	ENSRNOG00000001001	Retn	1
NONRATT019486.2	ENSRNOT00000038311	ENSRNOG00000009610	Tchhl1	1
NONRATT019897.2	ENSRNOT00000081951	ENSRNOG00000008310	Mpo	1
NONRATT019897.2	ENSRNOT00000065759	ENSRNOG00000015086	Plin1	1
NONRATT019897.2	ENSRNOT00000091197	ENSRNOG00000001001	Retn	1
NONRATT019897.2	ENSRNOT00000038311	ENSRNOG00000009610	Tchhl1	1
NONRATT020509.2	ENSRNOT00000081951	ENSRNOG00000008310	Mpo	1
NONRATT020509.2	ENSRNOT00000065759	ENSRNOG00000015086	Plin1	1
NONRATT020509.2	ENSRNOT00000091197	ENSRNOG00000001001	Retn	1
NONRATT020509.2	ENSRNOT00000038311	ENSRNOG00000009610	Tchhl1	1
NONRATT021201.2	ENSRNOT00000021320	ENSRNOG00000015921	Esco2	1
NONRATT021201.2	ENSRNOT00000083849	ENSRNOG00000053795	SNORD45	1
NONRATT021350.2	ENSRNOT00000082533	ENSRNOG00000053406	Gramd1c	1
NONRATT021402.2	ENSRNOT00000081951	ENSRNOG00000008310	Mpo	1
NONRATT021402.2	ENSRNOT00000065759	ENSRNOG00000015086	Plin1	1
NONRATT021402.2	ENSRNOT00000091197	ENSRNOG00000001001	Retn	1
NONRATT021402.2	ENSRNOT00000038311	ENSRNOG00000009610	Tchhl1	1
NONRATT021694.2	ENSRNOT00000021320	ENSRNOG00000015921	Esco2	1
NONRATT021694.2	ENSRNOT00000083849	ENSRNOG00000053795	SNORD45	1
NONRATT021997.2	ENSRNOT00000081951	ENSRNOG00000008310	Mpo	1
NONRATT021997.2	ENSRNOT00000065759	ENSRNOG00000015086	Plin1	1
NONRATT021997.2	ENSRNOT00000091197	ENSRNOG00000001001	Retn	1
NONRATT021997.2	ENSRNOT00000038311	ENSRNOG00000009610	Tchhl1	1
NONRATT022191.2	ENSRNOT00000081951	ENSRNOG00000008310	Mpo	1
NONRATT022191.2	ENSRNOT00000065759	ENSRNOG00000015086	Plin1	1
NONRATT022191.2	ENSRNOT00000091197	ENSRNOG00000001001	Retn	1
NONRATT022191.2	ENSRNOT00000038311	ENSRNOG00000009610	Tchhl1	1
NONRATT023402.2	ENSRNOT00000082533	ENSRNOG00000053406	Gramd1c	1
NONRATT025511.2	ENSRNOT00000082533	ENSRNOG00000053406	Gramd1c	1
NONRATT025512.2	ENSRNOT00000082533	ENSRNOG00000053406	Gramd1c	1
NONRATT028587.2	ENSRNOT00000081951	ENSRNOG00000008310	Mpo	1
NONRATT028587.2	ENSRNOT00000065759	ENSRNOG00000015086	Plin1	1
NONRATT028587.2	ENSRNOT00000091197	ENSRNOG00000001001	Retn	1
NONRATT028587.2	ENSRNOT00000038311	ENSRNOG00000009610	Tchhl1	1
NONRATT029618.2	ENSRNOT00000081951	ENSRNOG00000008310	Mpo	1
NONRATT029618.2	ENSRNOT00000065759	ENSRNOG00000015086	Plin1	1
NONRATT029618.2	ENSRNOT00000091197	ENSRNOG00000001001	Retn	1
NONRATT029618.2	ENSRNOT00000038311	ENSRNOG00000009610	Tchhl1	1
NONRATT030878.2	ENSRNOT00000021320	ENSRNOG00000015921	Esco2	1
NONRATT030878.2	ENSRNOT00000083849	ENSRNOG00000053795	SNORD45	1
NONRATT030984.2	ENSRNOT00000021320	ENSRNOG00000015921	Esco2	1
NONRATT030984.2	ENSRNOT00000083849	ENSRNOG00000053795	SNORD45	1
NONRATT031263.2	ENSRNOT00000081951	ENSRNOG00000008310	Mpo	1
NONRATT031263.2	ENSRNOT00000065759	ENSRNOG00000015086	Plin1	1
NONRATT031263.2	ENSRNOT00000091197	ENSRNOG00000001001	Retn	1
NONRATT031263.2	ENSRNOT00000038311	ENSRNOG00000009610	Tchhl1	1
NONRATT031281.2	ENSRNOT00000081951	ENSRNOG00000008310	Mpo	1
NONRATT031281.2	ENSRNOT00000065759	ENSRNOG00000015086	Plin1	1
NONRATT031281.2	ENSRNOT00000091197	ENSRNOG00000001001	Retn	1
NONRATT031281.2	ENSRNOT00000038311	ENSRNOG00000009610	Tchhl1	1
MSTRG.10244.2	ENSRNOT00000021320	ENSRNOG00000015921	Esco2	1
MSTRG.11449.2	ENSRNOT00000021320	ENSRNOG00000015921	Esco2	1
MSTRG.11597.1	ENSRNOT00000021320	ENSRNOG00000015921	Esco2	1
MSTRG.11664.1	ENSRNOT00000021320	ENSRNOG00000015921	Esco2	1
MSTRG.6537.3	ENSRNOT00000021320	ENSRNOG00000015921	Esco2	1
MSTRG.17489.3	ENSRNOT00000082533	ENSRNOG00000053406	Gramd1c	1
MSTRG.17489.4	ENSRNOT00000082533	ENSRNOG00000053406	Gramd1c	1
MSTRG.17489.5	ENSRNOT00000082533	ENSRNOG00000053406	Gramd1c	1
MSTRG.22910.3	ENSRNOT00000082533	ENSRNOG00000053406	Gramd1c	1
MSTRG.5414.3	ENSRNOT00000082533	ENSRNOG00000053406	Gramd1c	1
MSTRG.11575.7	ENSRNOT00000081951	ENSRNOG00000008310	Mpo	1
MSTRG.2442.2	ENSRNOT00000081951	ENSRNOG00000008310	Mpo	1
MSTRG.8858.2	ENSRNOT00000081951	ENSRNOG00000008310	Mpo	1
MSTRG.11575.7	ENSRNOT00000065759	ENSRNOG00000015086	Plin1	1
MSTRG.2442.2	ENSRNOT00000065759	ENSRNOG00000015086	Plin1	1
MSTRG.8858.2	ENSRNOT00000065759	ENSRNOG00000015086	Plin1	1
MSTRG.11575.7	ENSRNOT00000091197	ENSRNOG00000001001	Retn	1
MSTRG.2442.2	ENSRNOT00000091197	ENSRNOG00000001001	Retn	1
MSTRG.8858.2	ENSRNOT00000091197	ENSRNOG00000001001	Retn	1
MSTRG.10244.2	ENSRNOT00000083849	ENSRNOG00000053795	SNORD45	1
MSTRG.11449.2	ENSRNOT00000083849	ENSRNOG00000053795	SNORD45	1
MSTRG.11597.1	ENSRNOT00000083849	ENSRNOG00000053795	SNORD45	1
MSTRG.11664.1	ENSRNOT00000083849	ENSRNOG00000053795	SNORD45	1
MSTRG.6537.3	ENSRNOT00000083849	ENSRNOG00000053795	SNORD45	1
MSTRG.11575.7	ENSRNOT00000038311	ENSRNOG00000009610	Tchhl1	1
MSTRG.2442.2	ENSRNOT00000038311	ENSRNOG00000009610	Tchhl1	1
MSTRG.8858.2	ENSRNOT00000038311	ENSRNOG00000009610	Tchhl1	1
DElncRNA, differentially expressed long non-coding RNA; DEmRNA, differentially expressed mRNA.
